# Supplementary material for: Application of the Ugi four-component condensation reaction for the synthesis of α,α- and α,β-dipeptides substituted with fluoroarylalkyl pendent groups†
Source: Royal Society of Chemistry journal article supplement (doi:10.1039/b007455l), 2000-01-01

## Supplementary information 2

$^1\text{H}$ -NMR (270 MHz) spectra of the compounds **2** and **8**

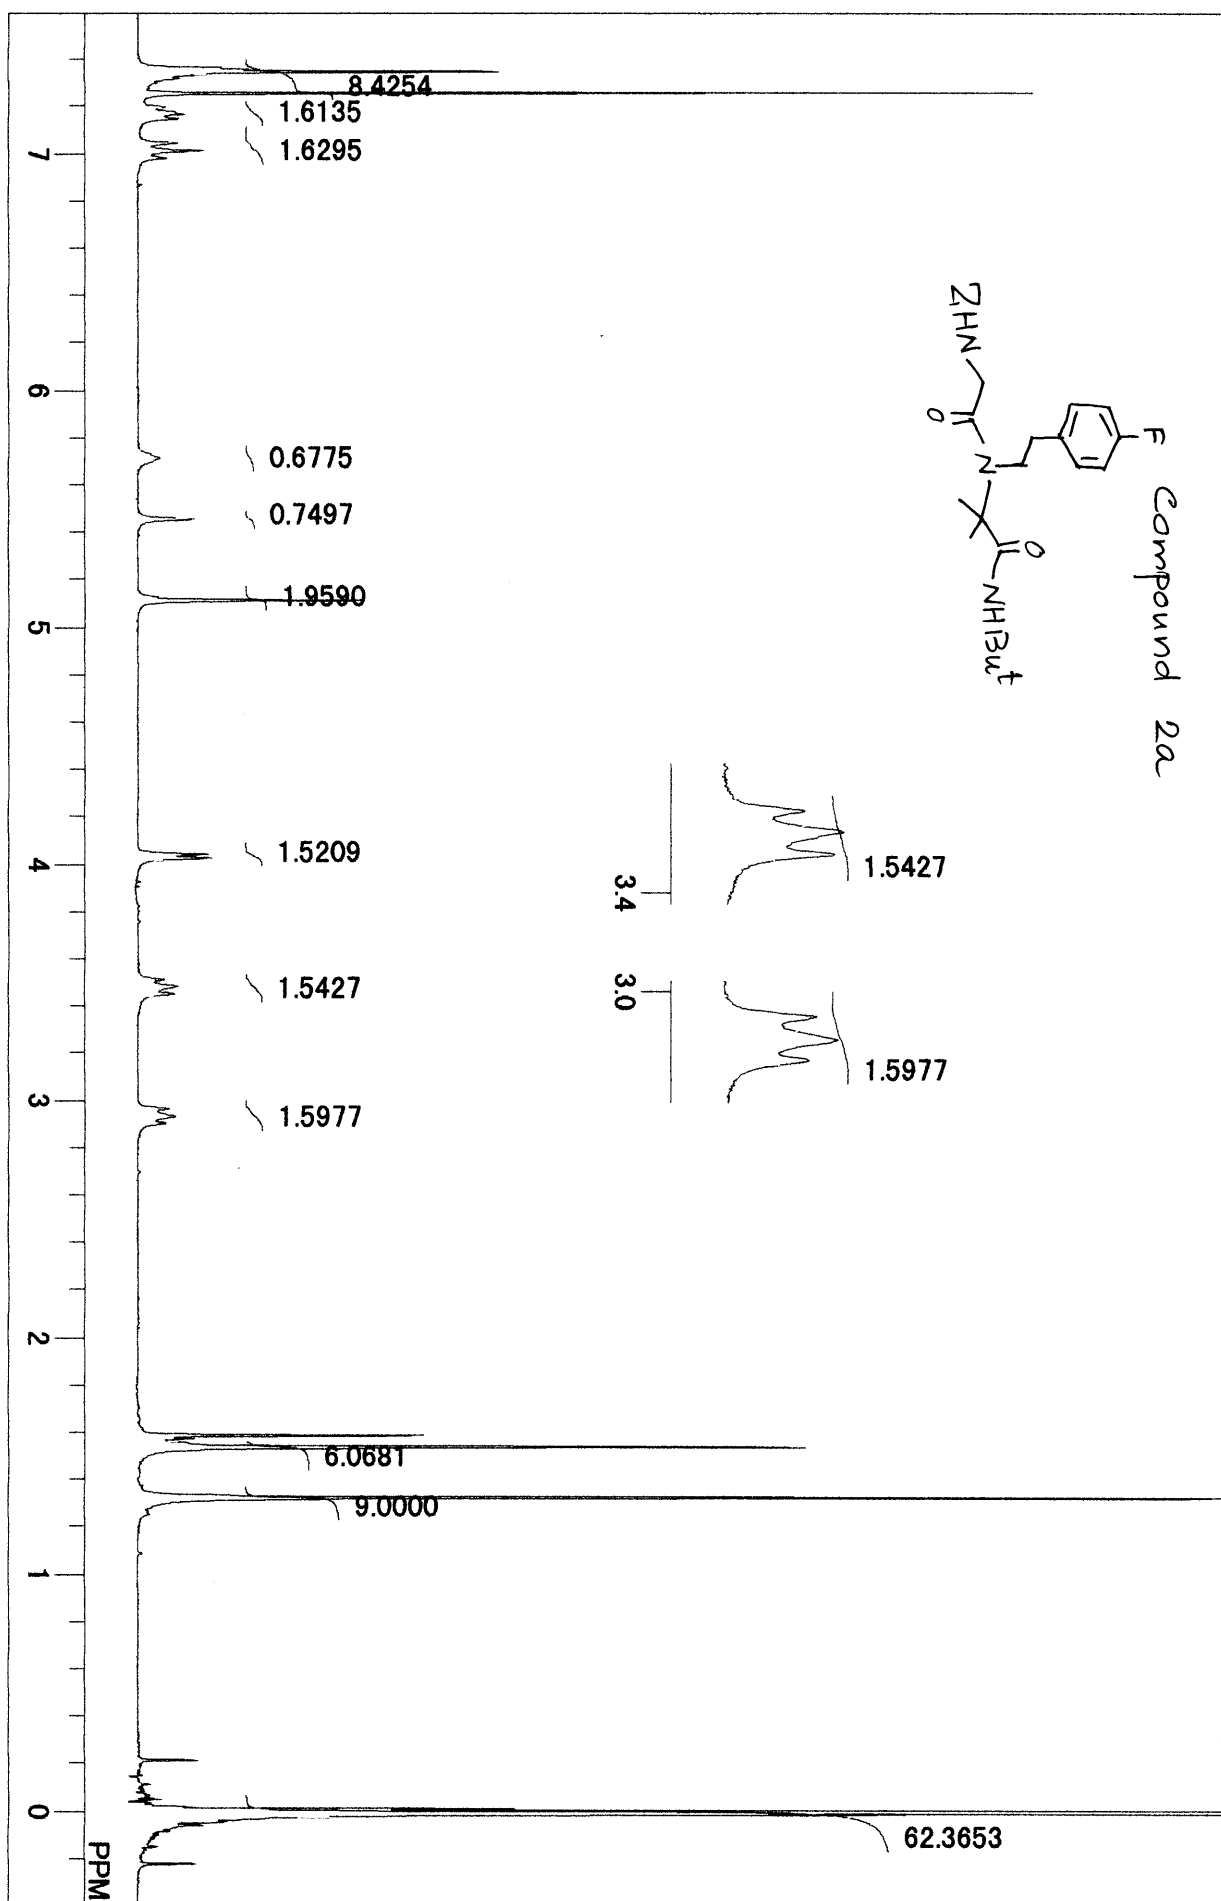

2b

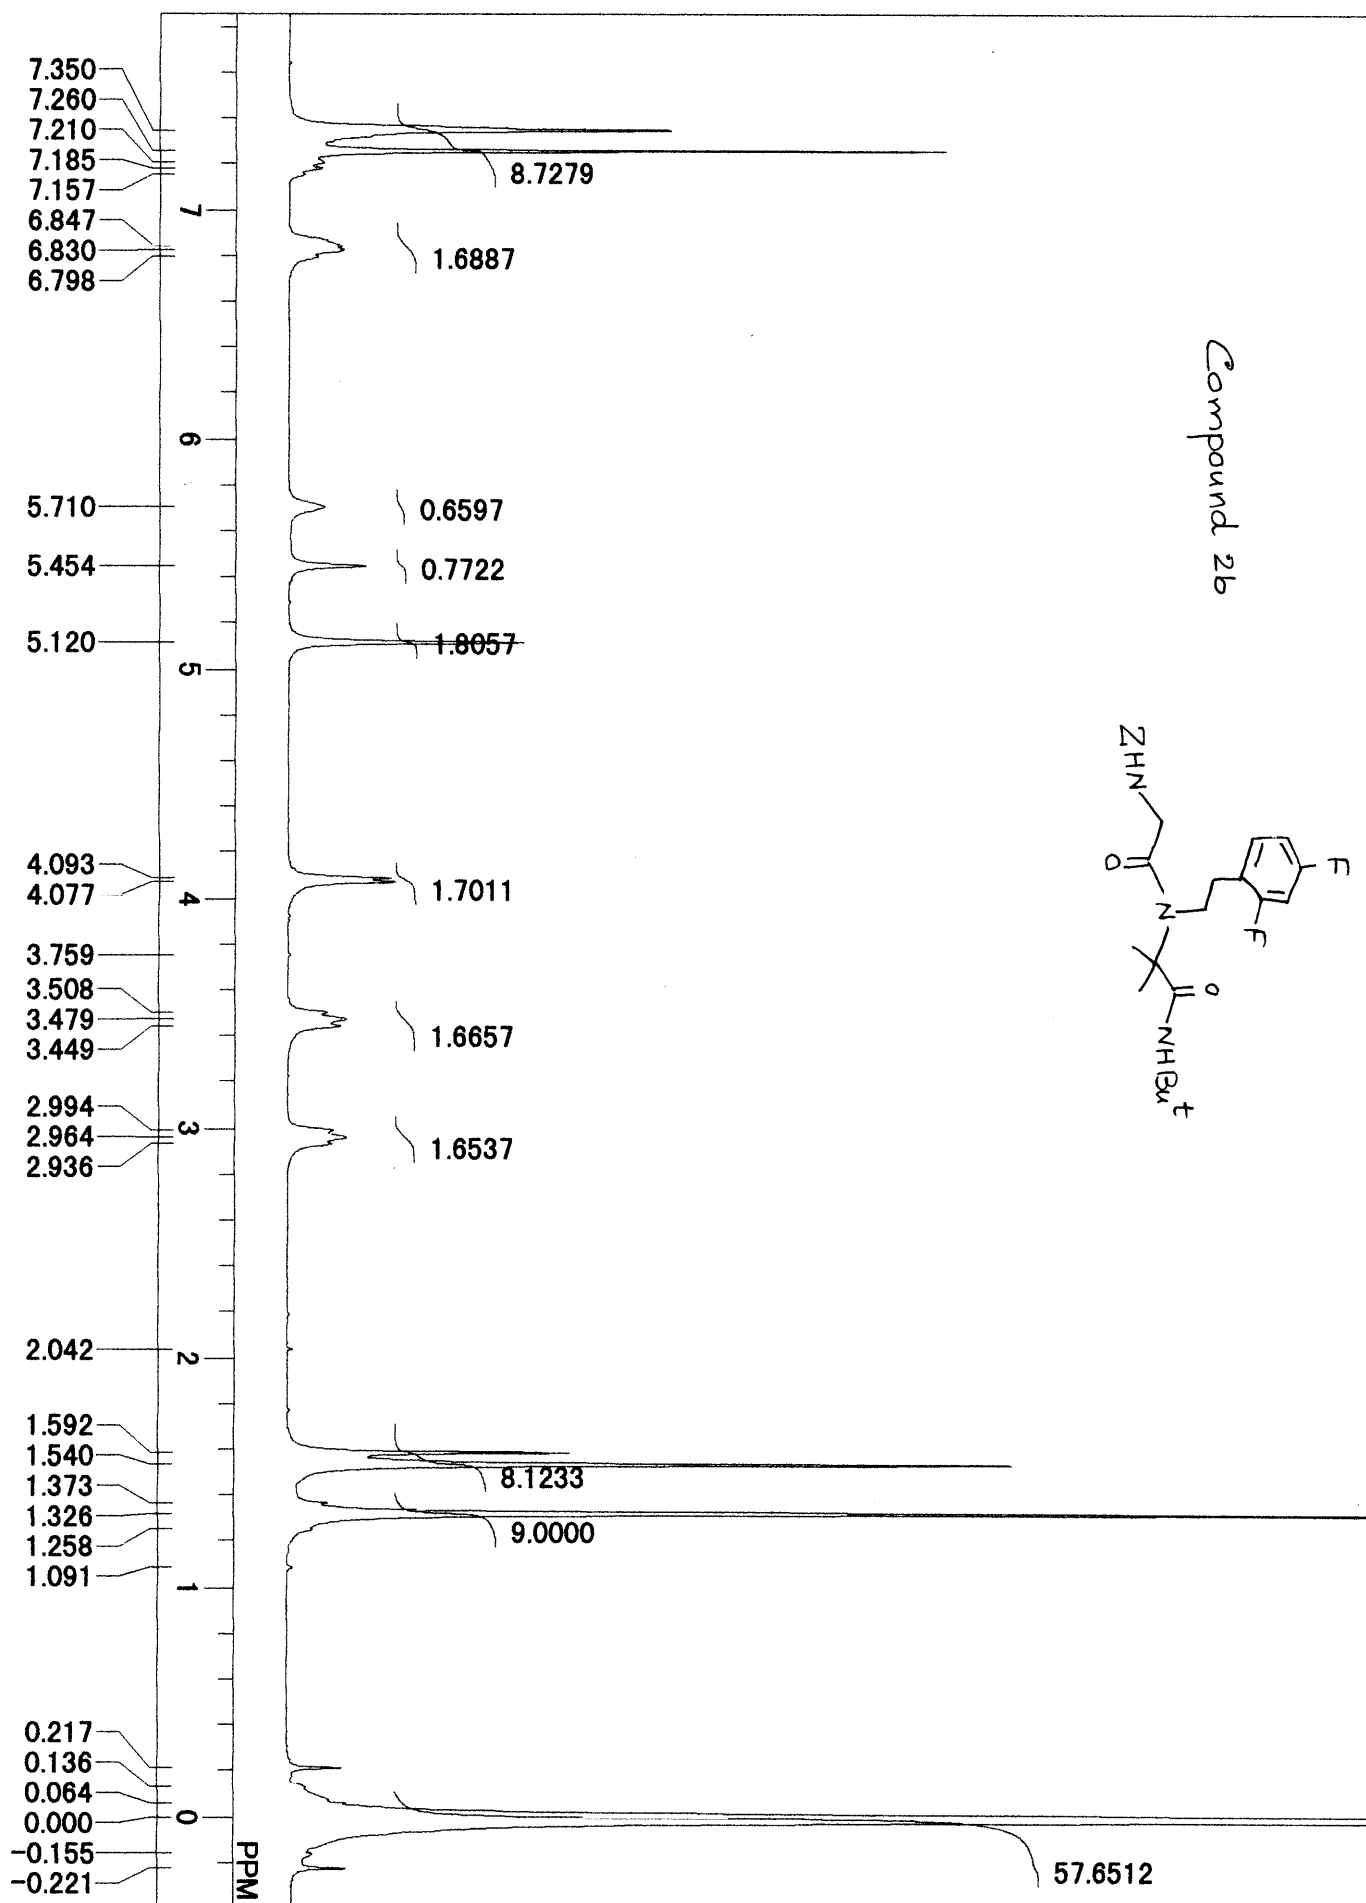

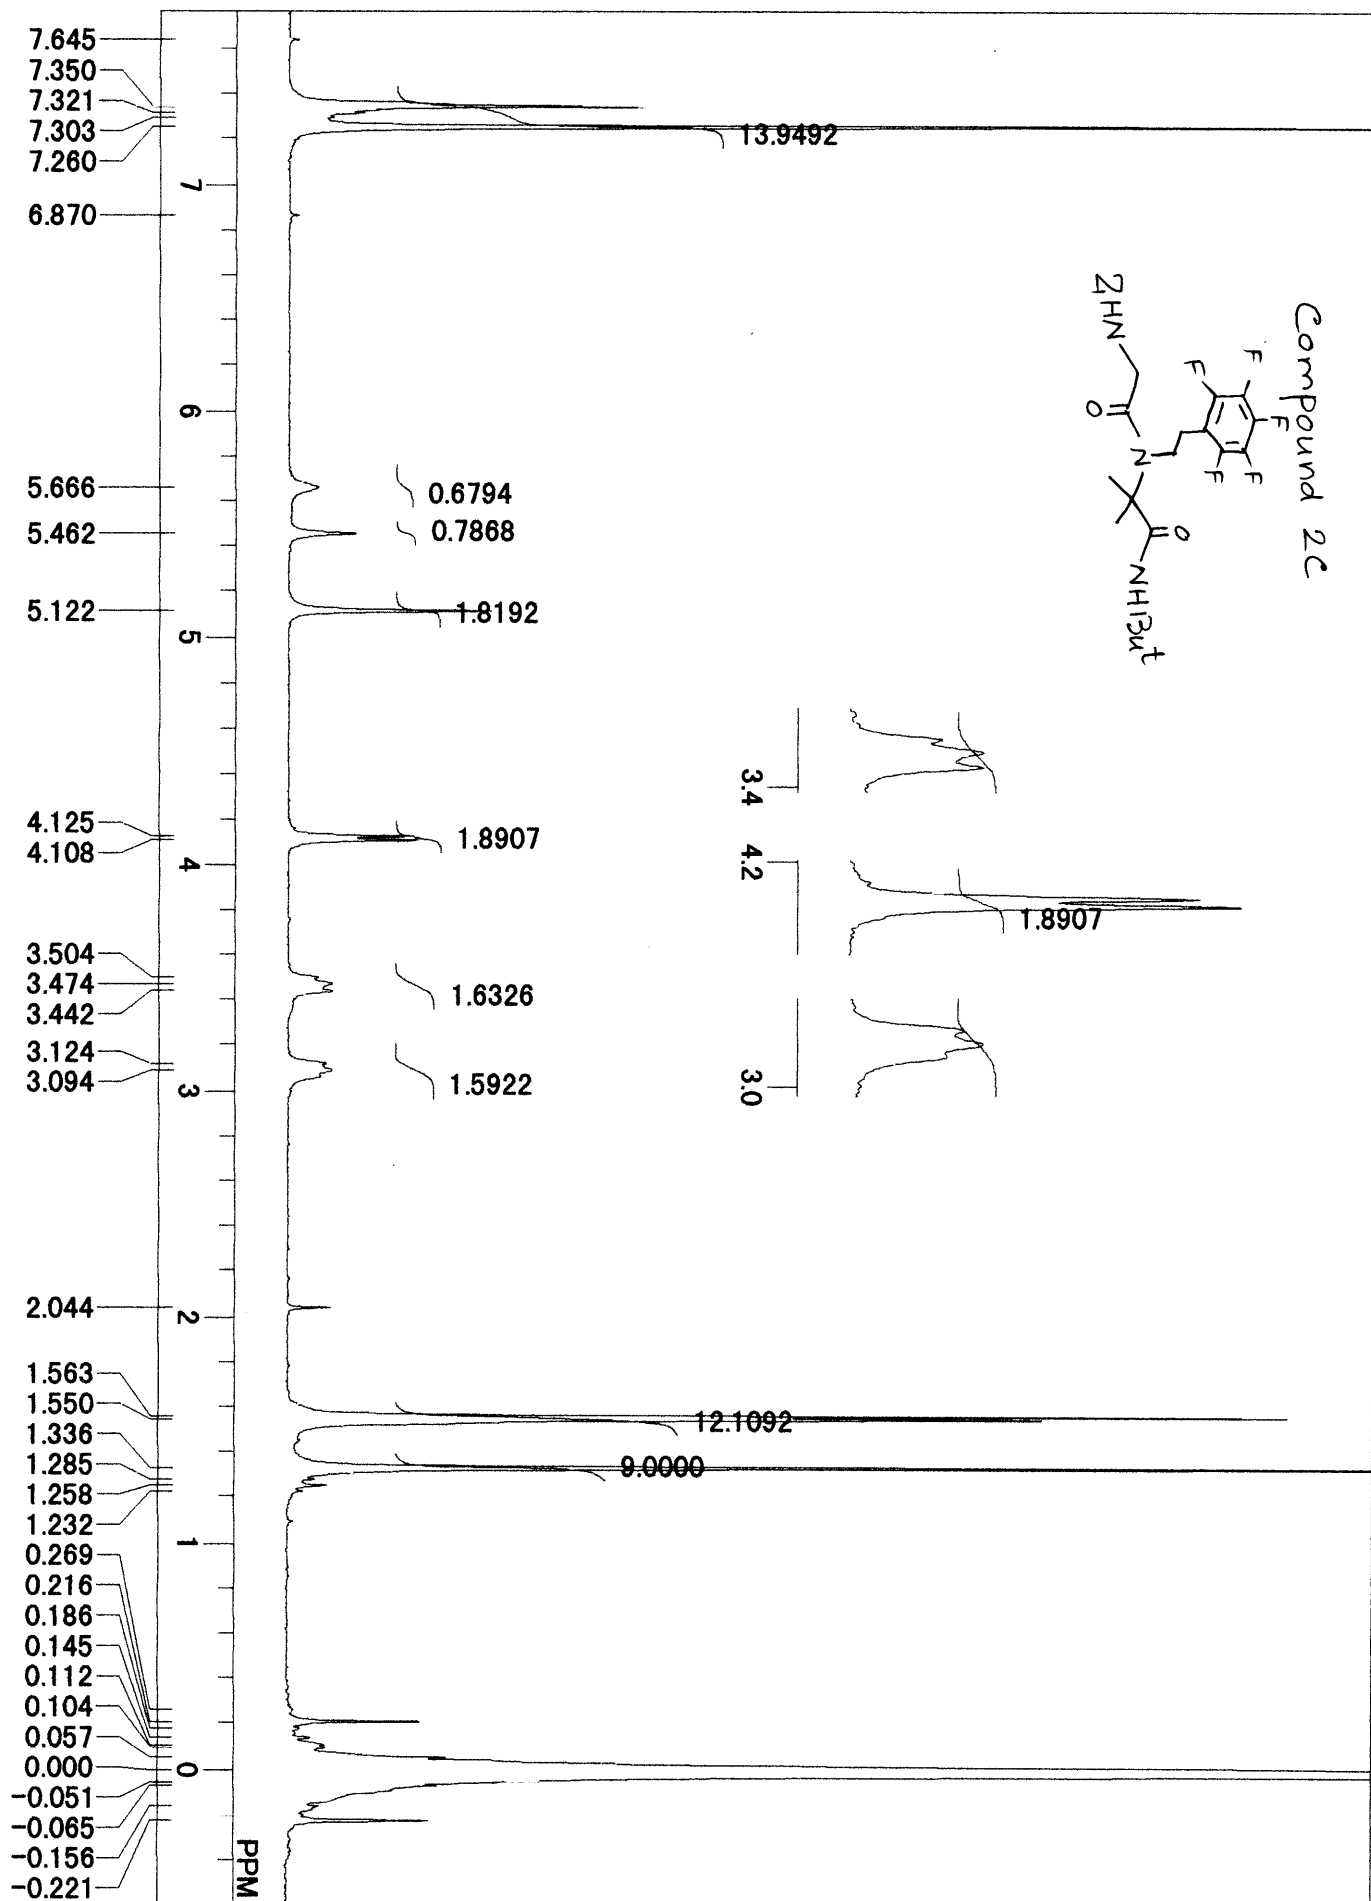

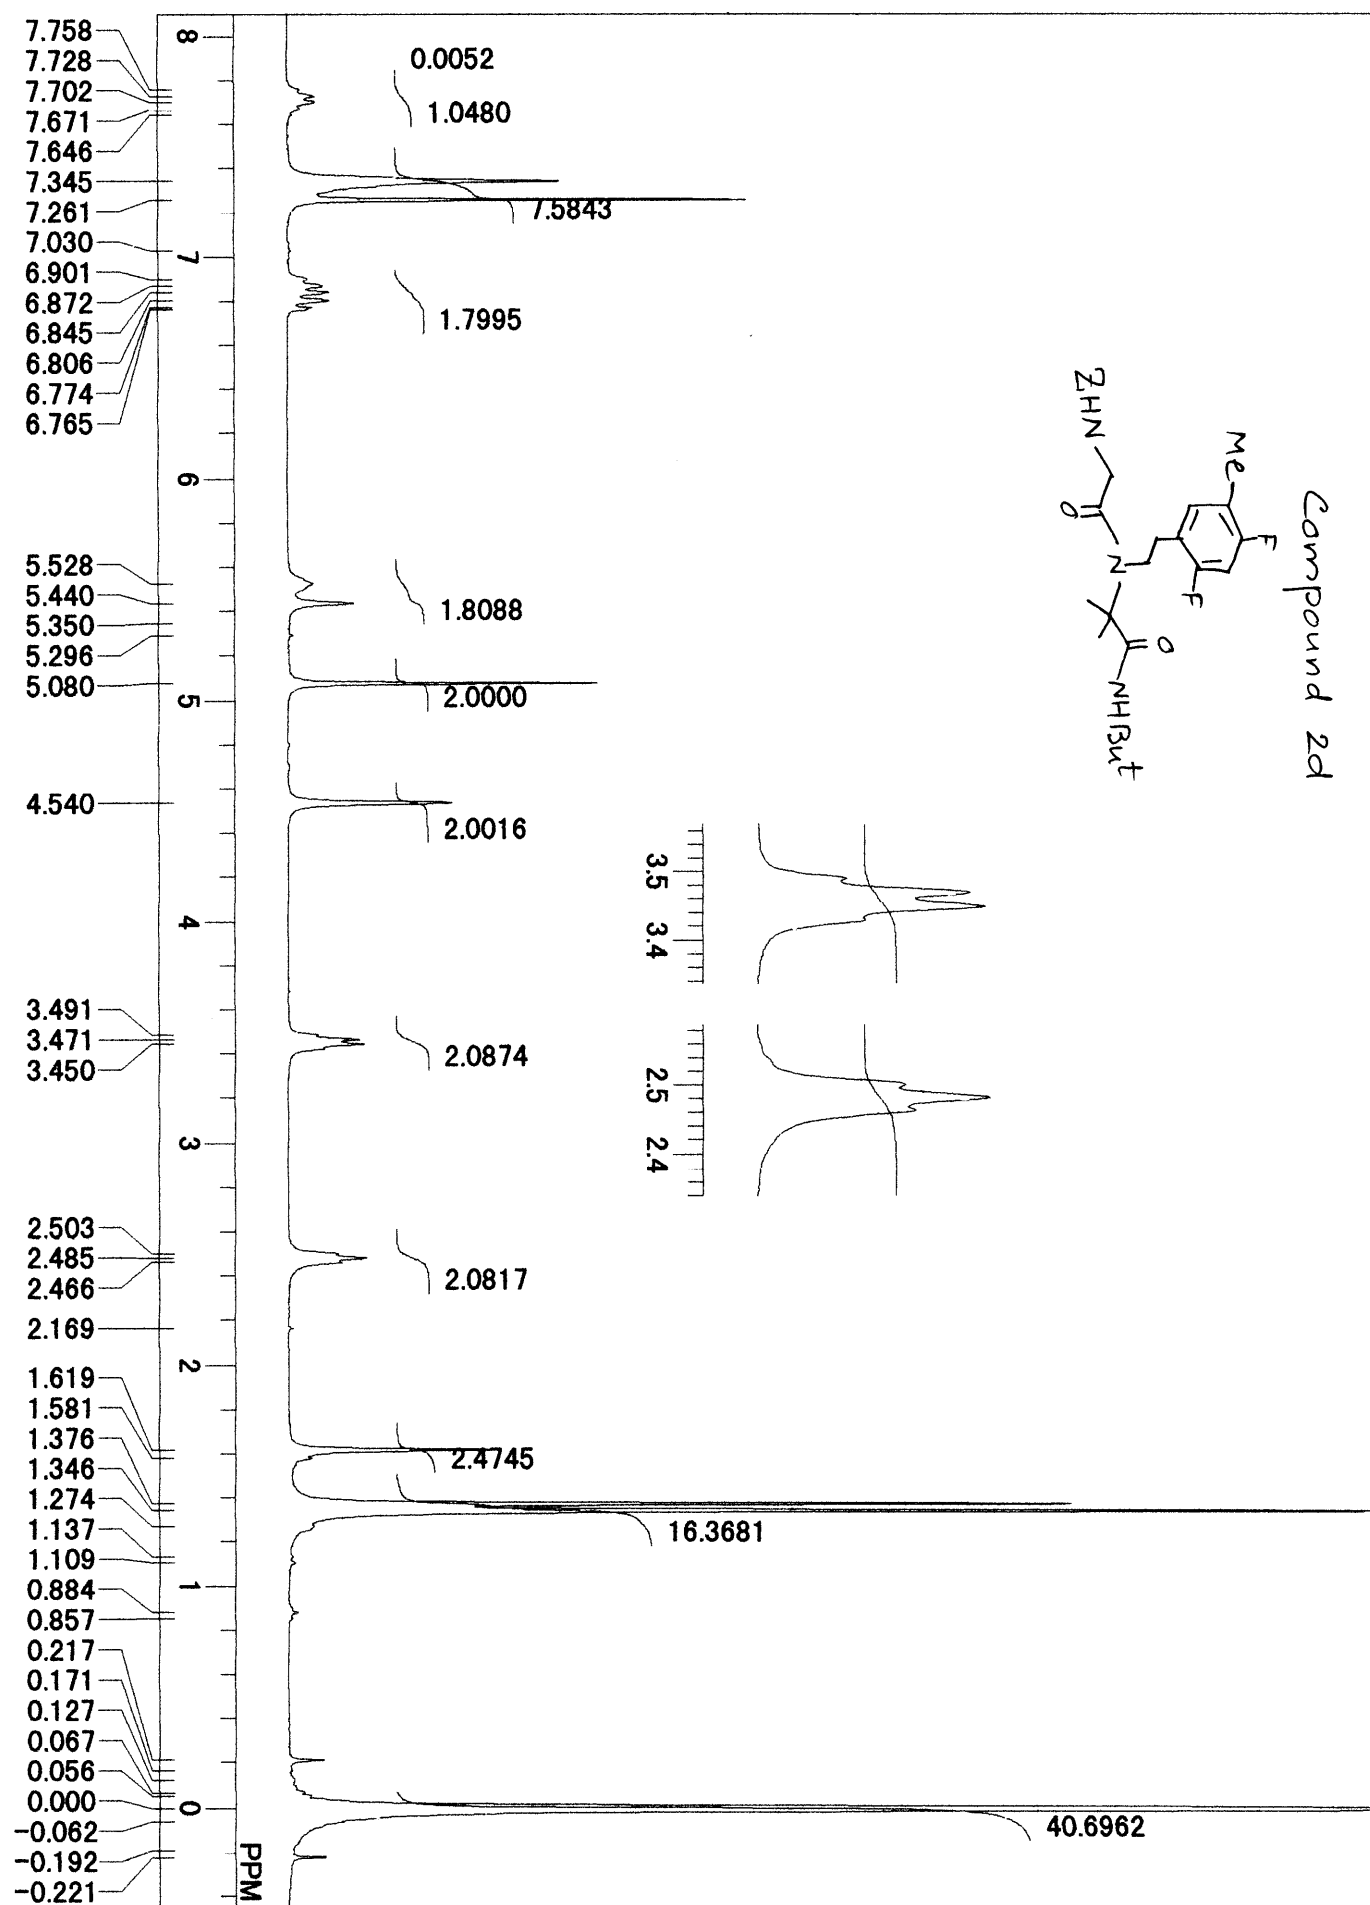

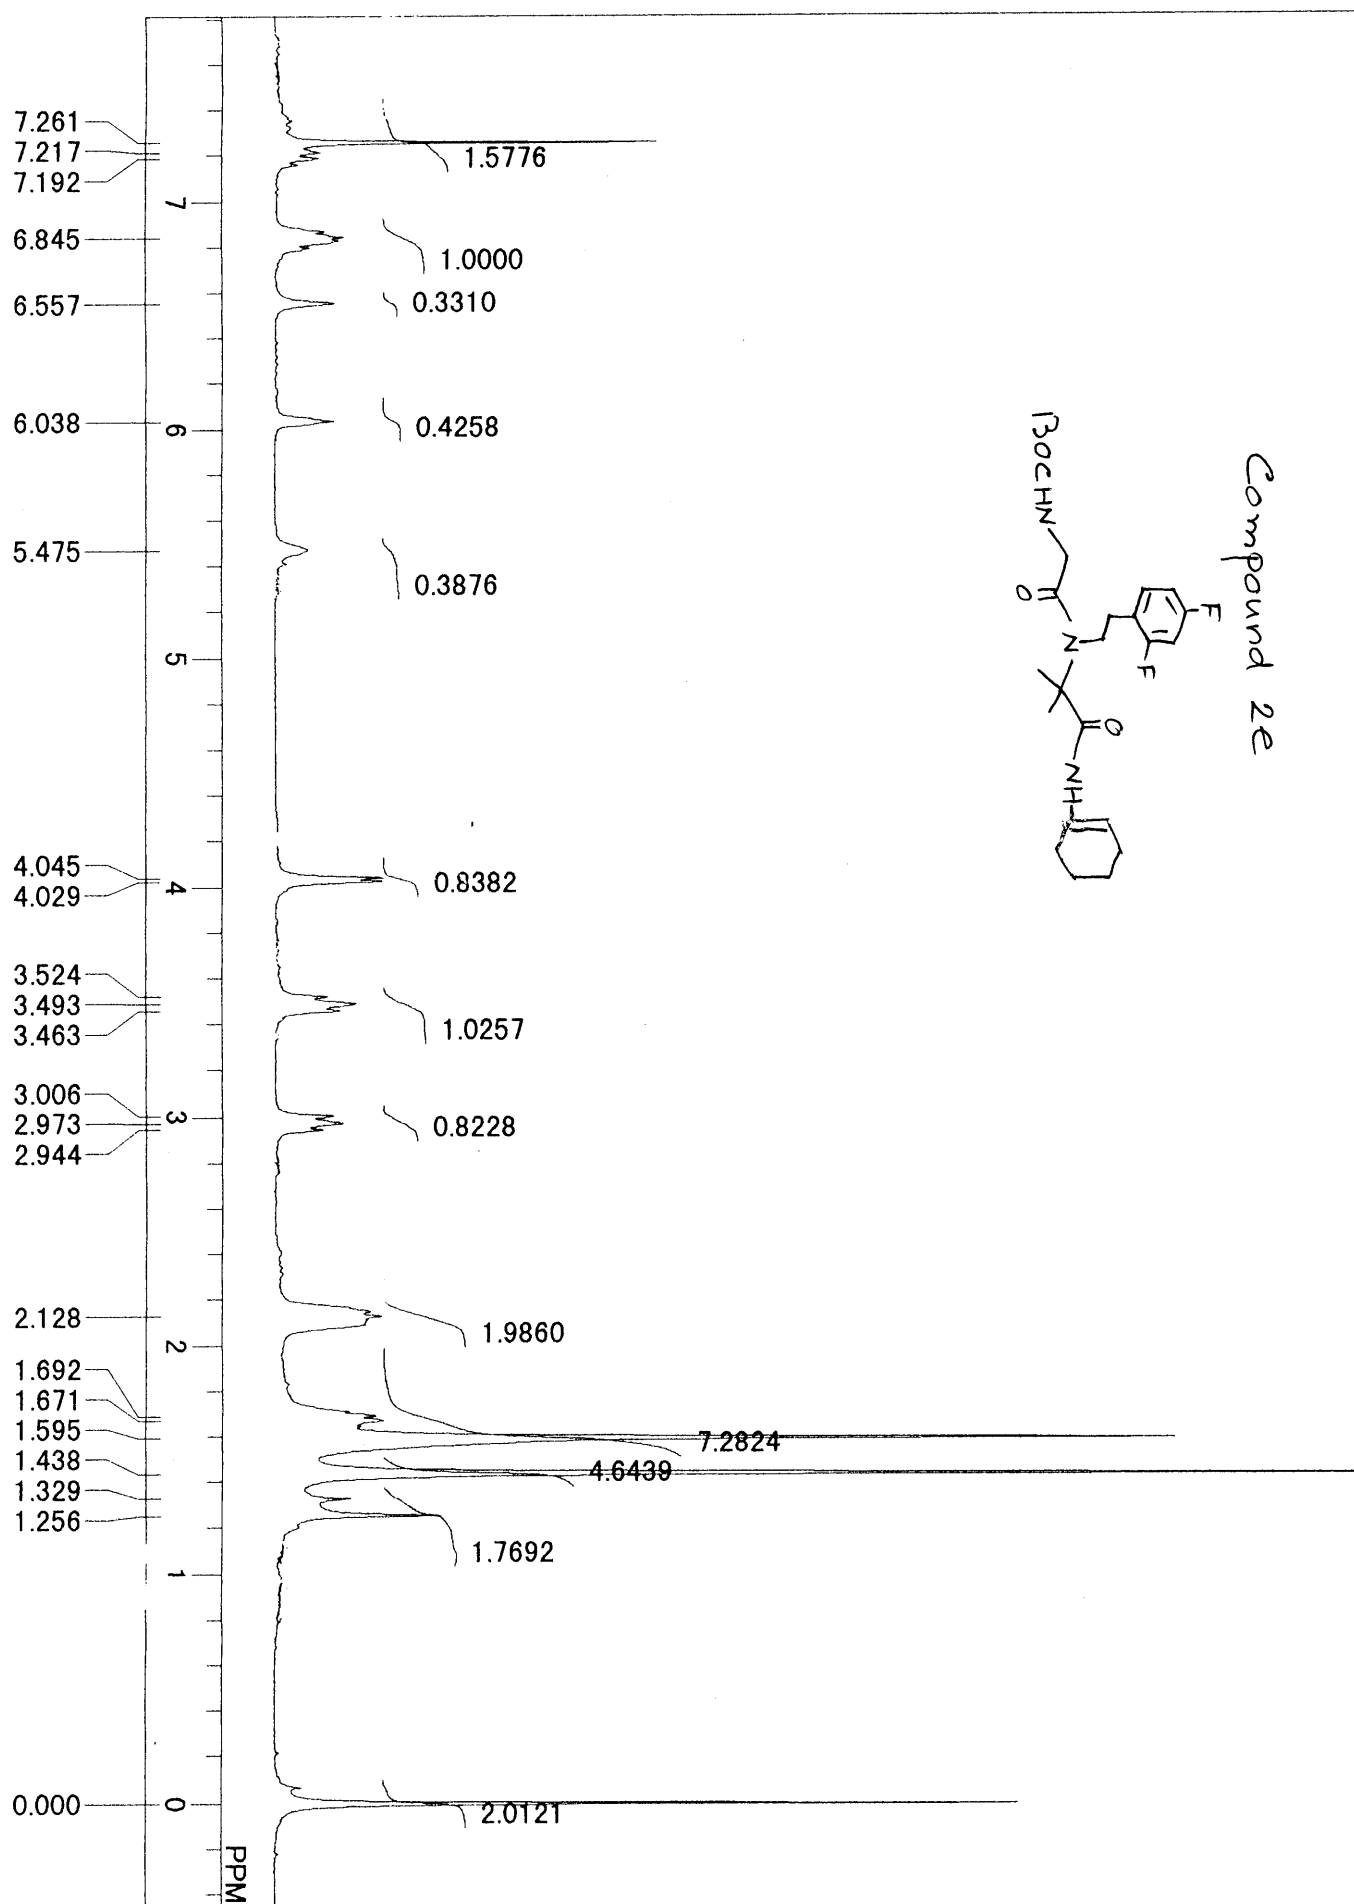

8a

Compound 8a

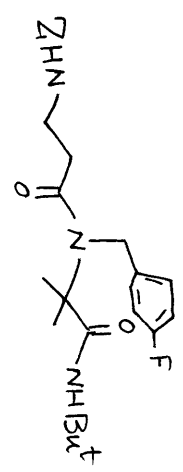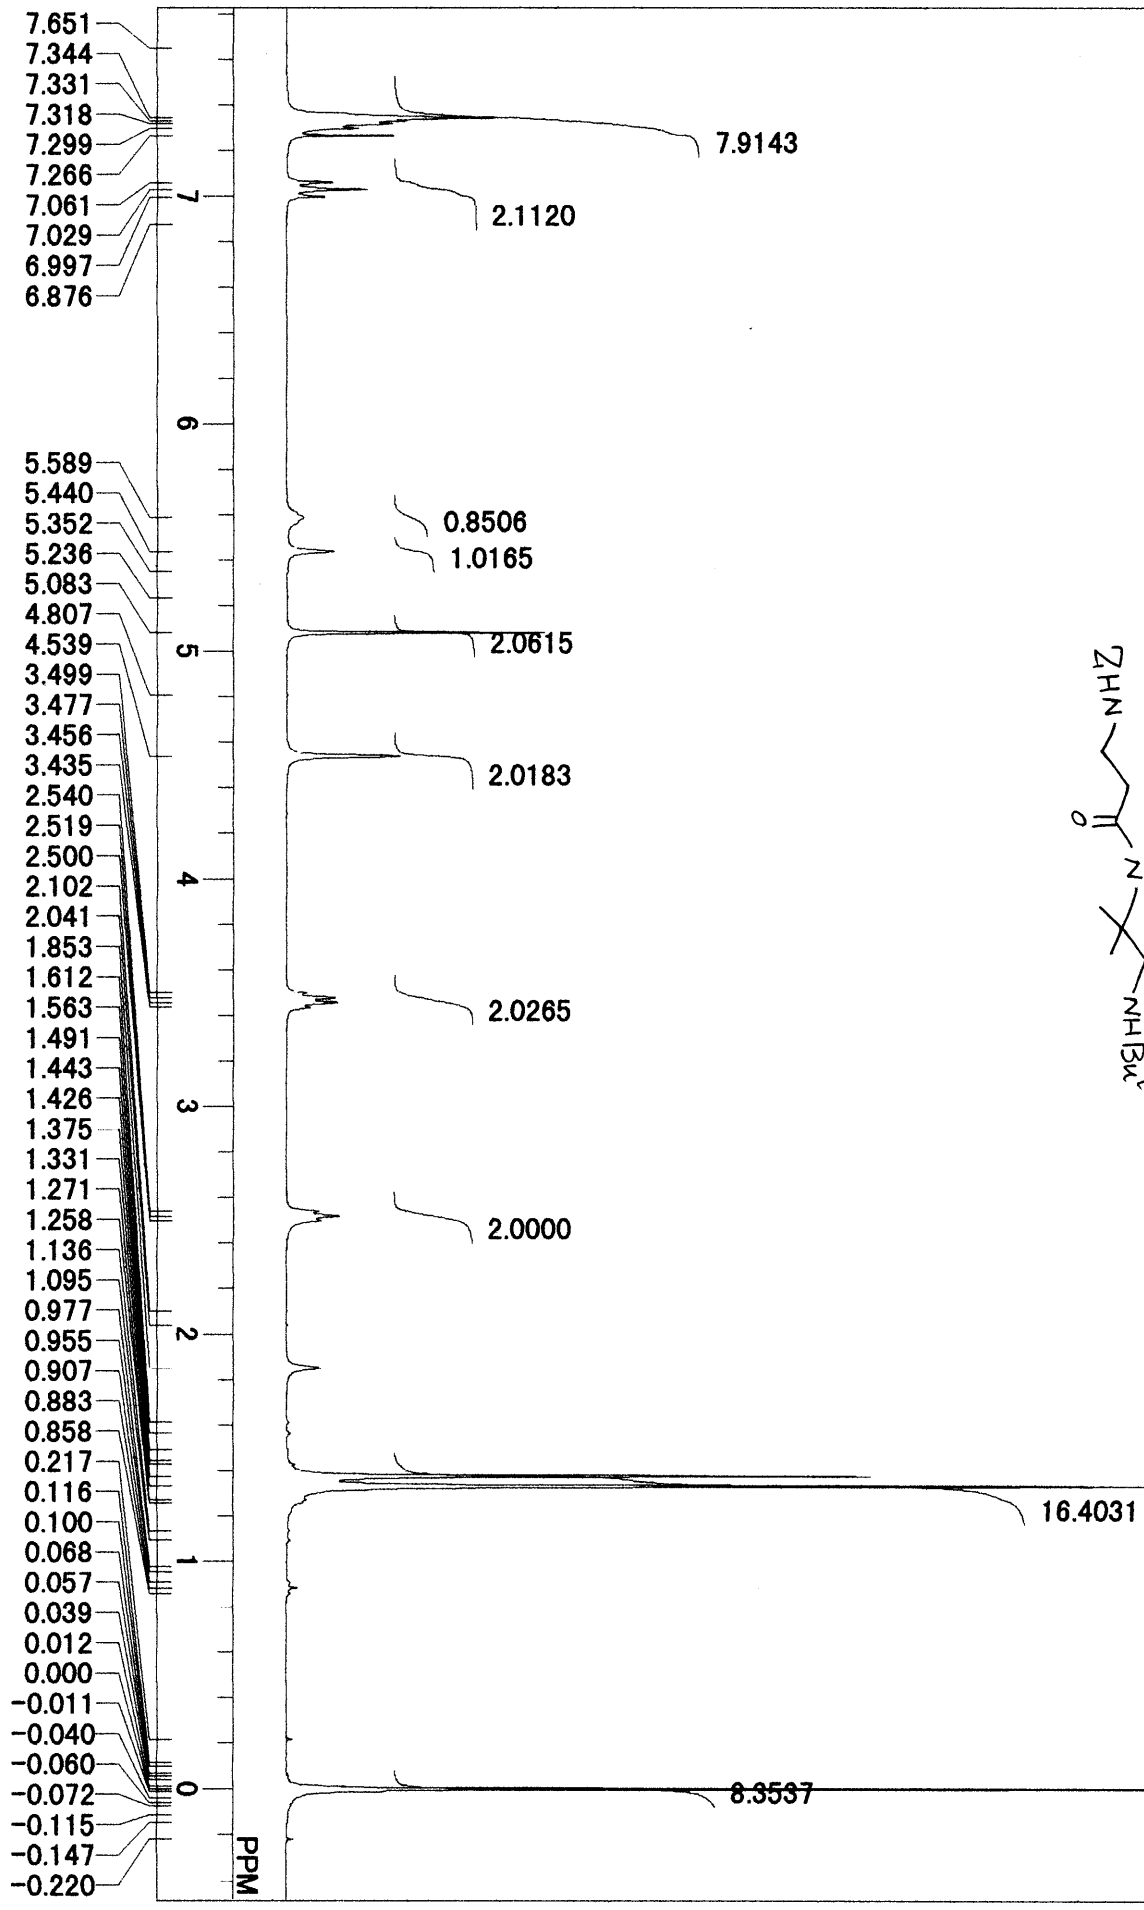

Compound 8b

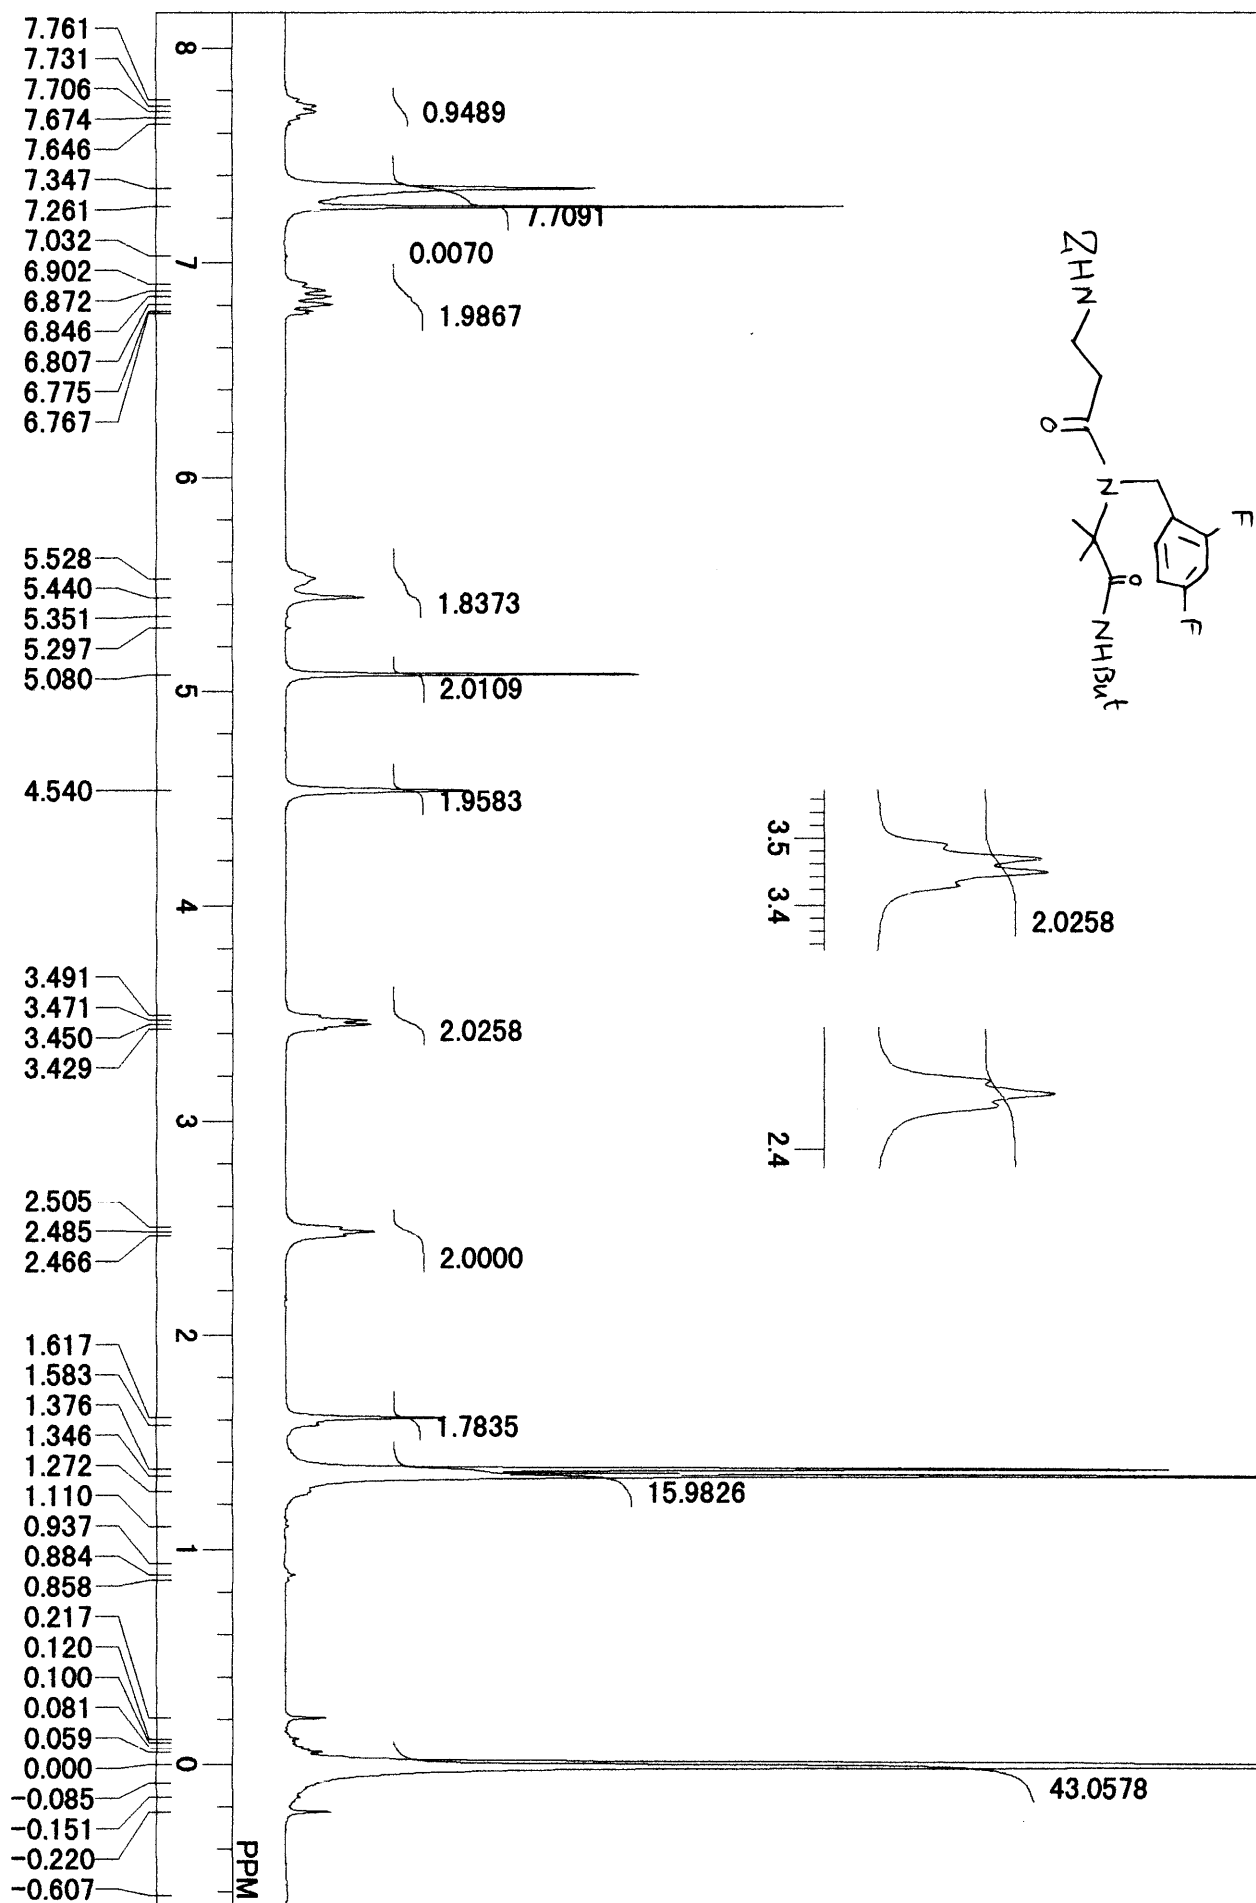



Compound 8c

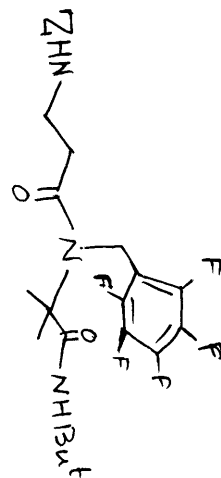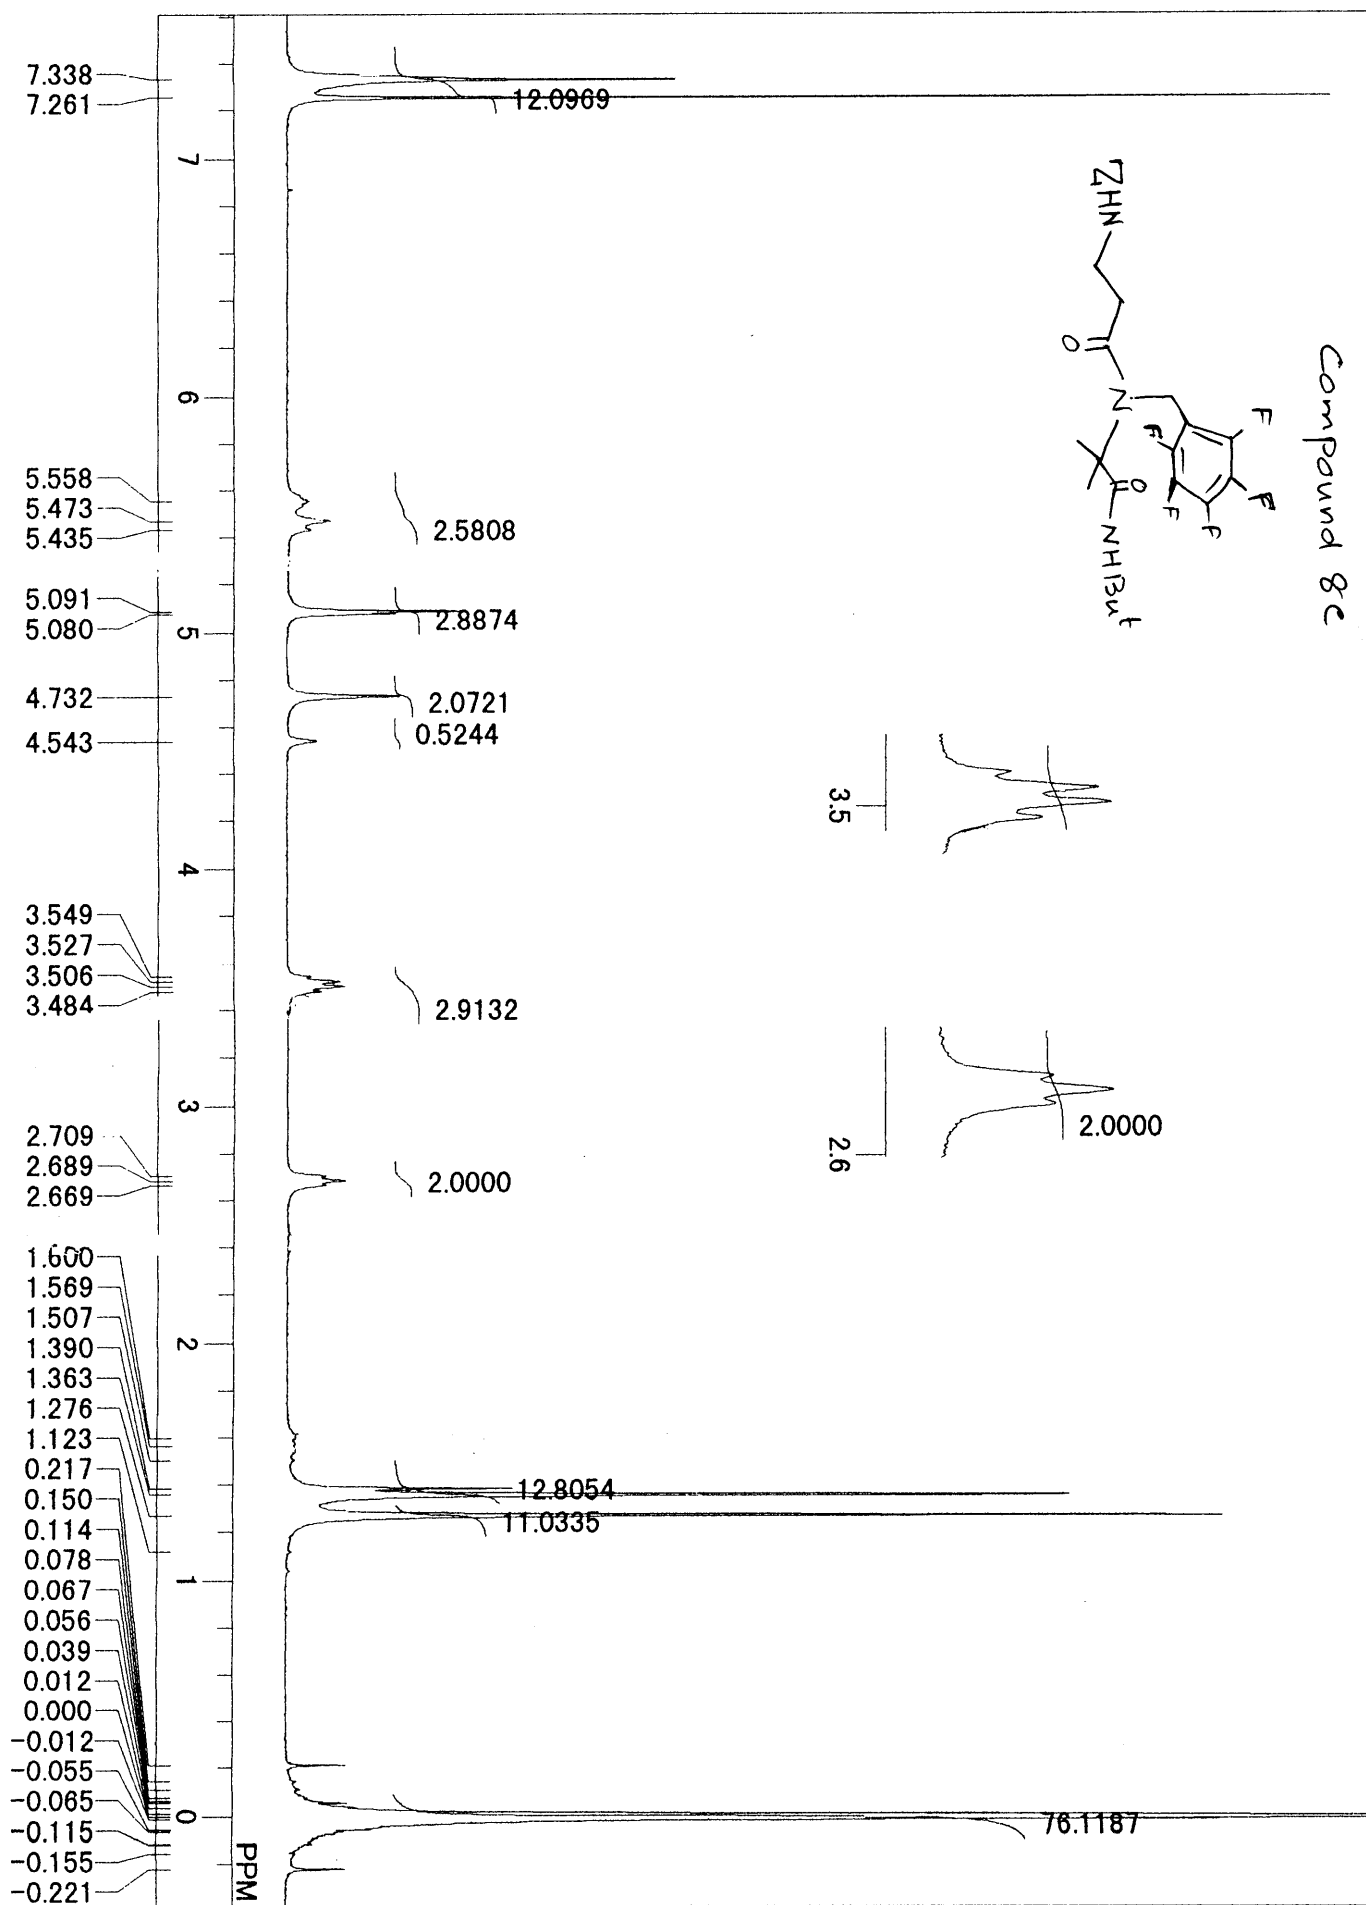

Compound 8d

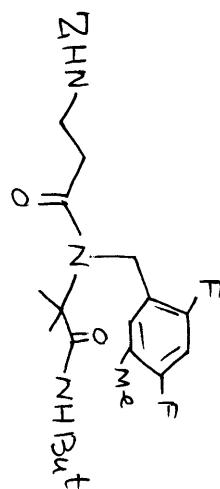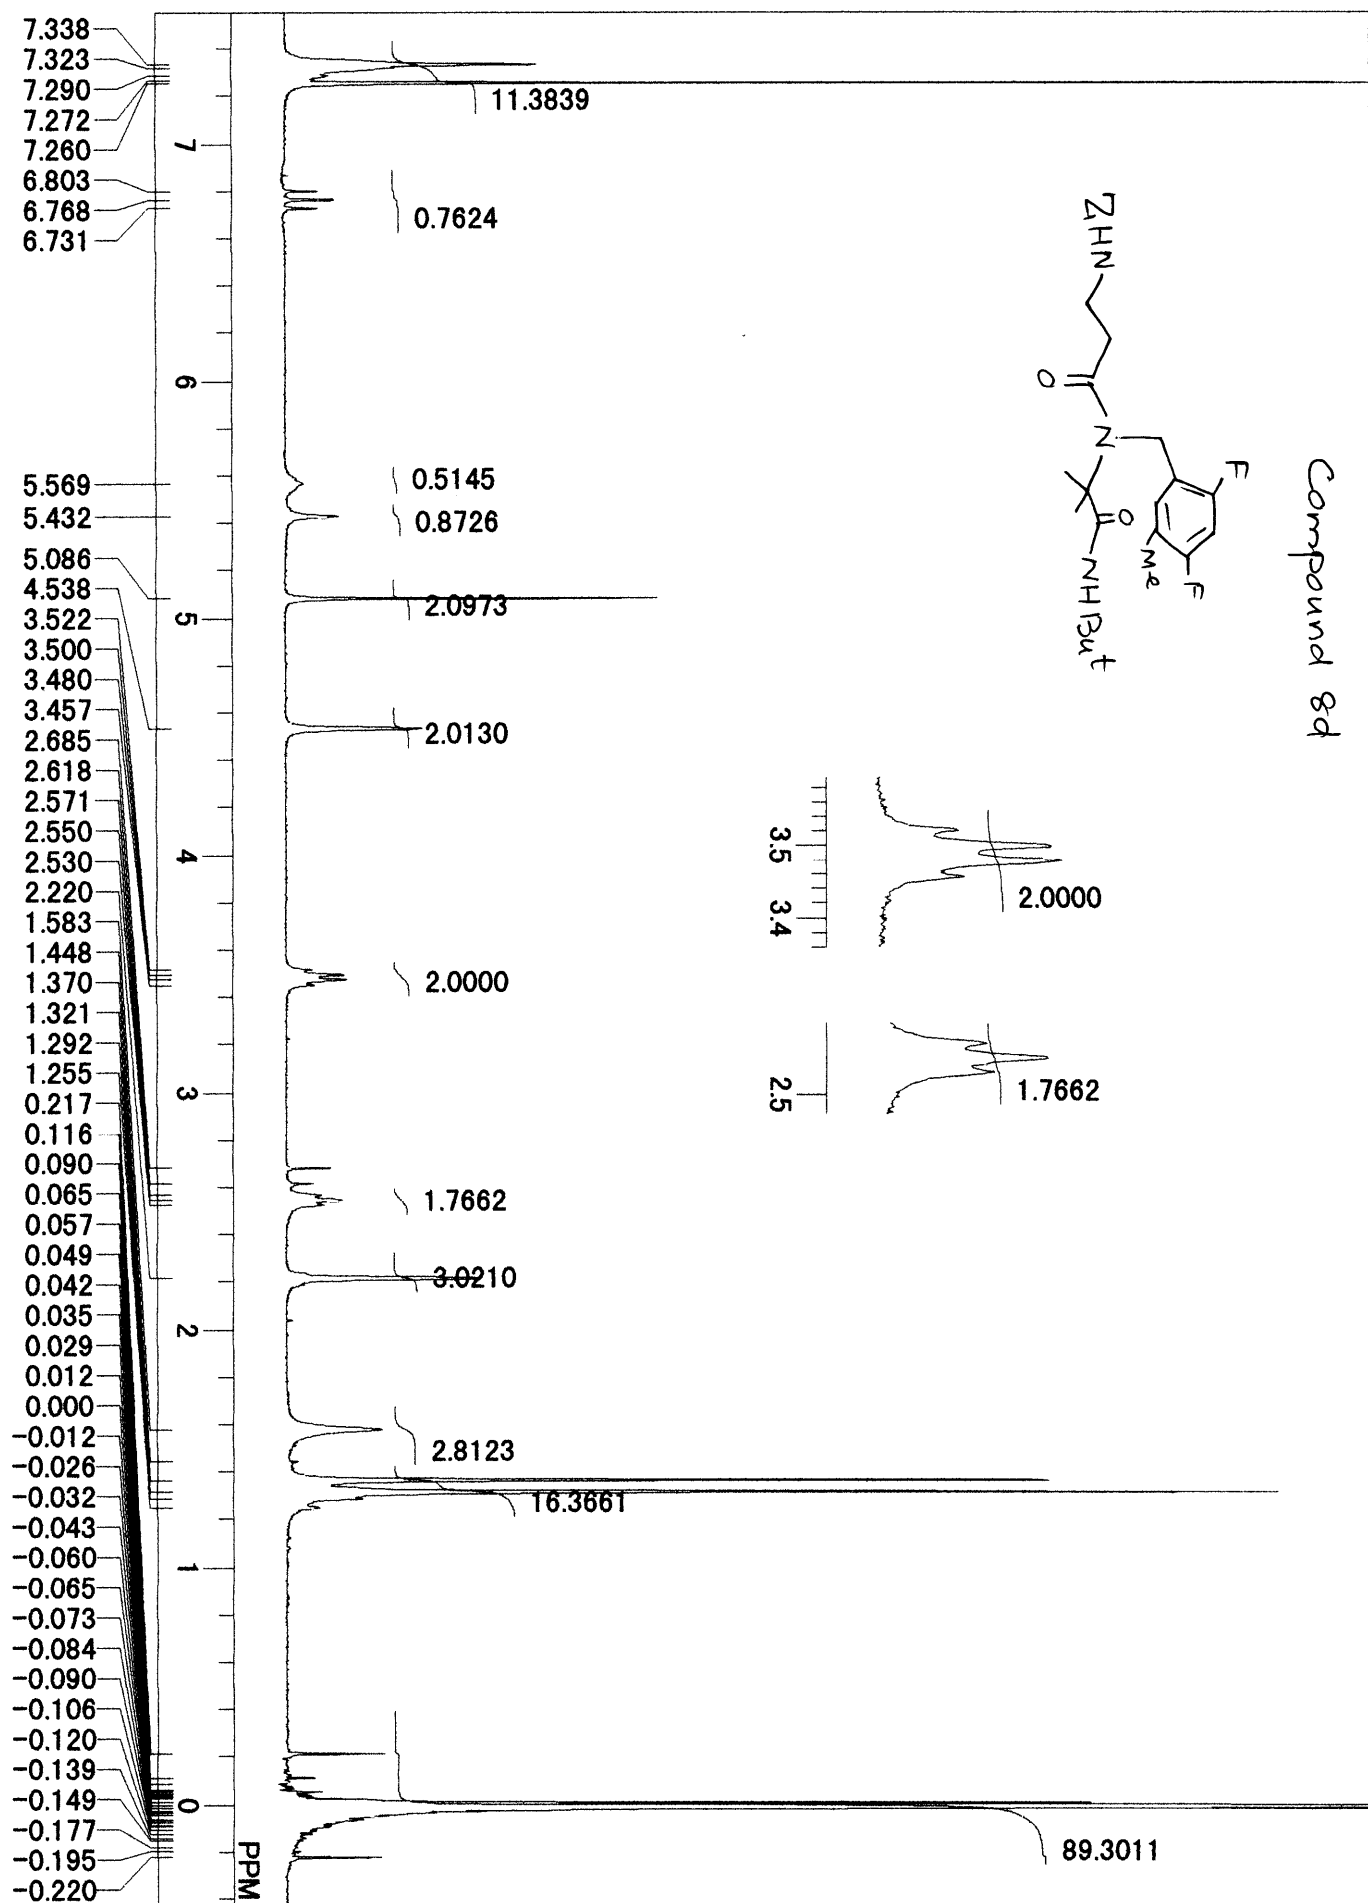

Compound 8e

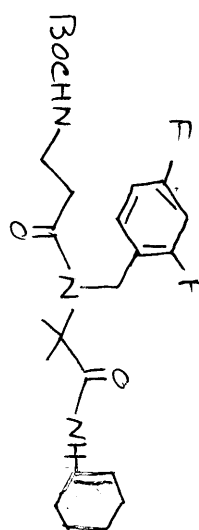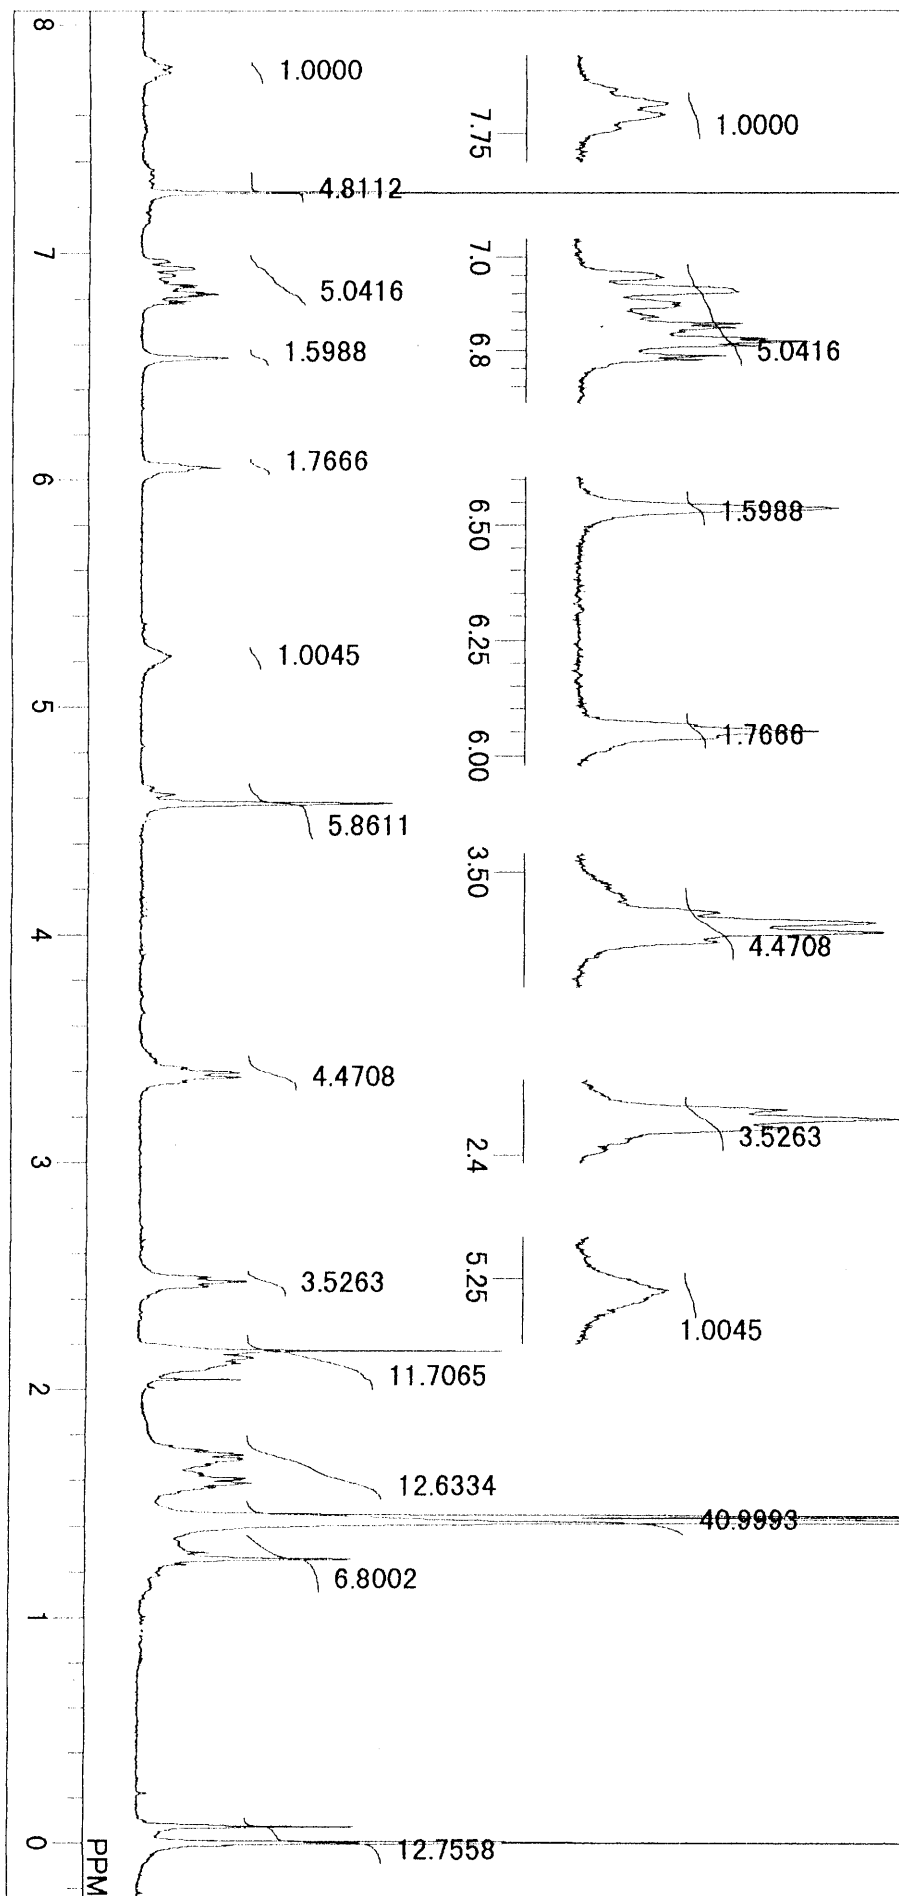

# Compound 2b

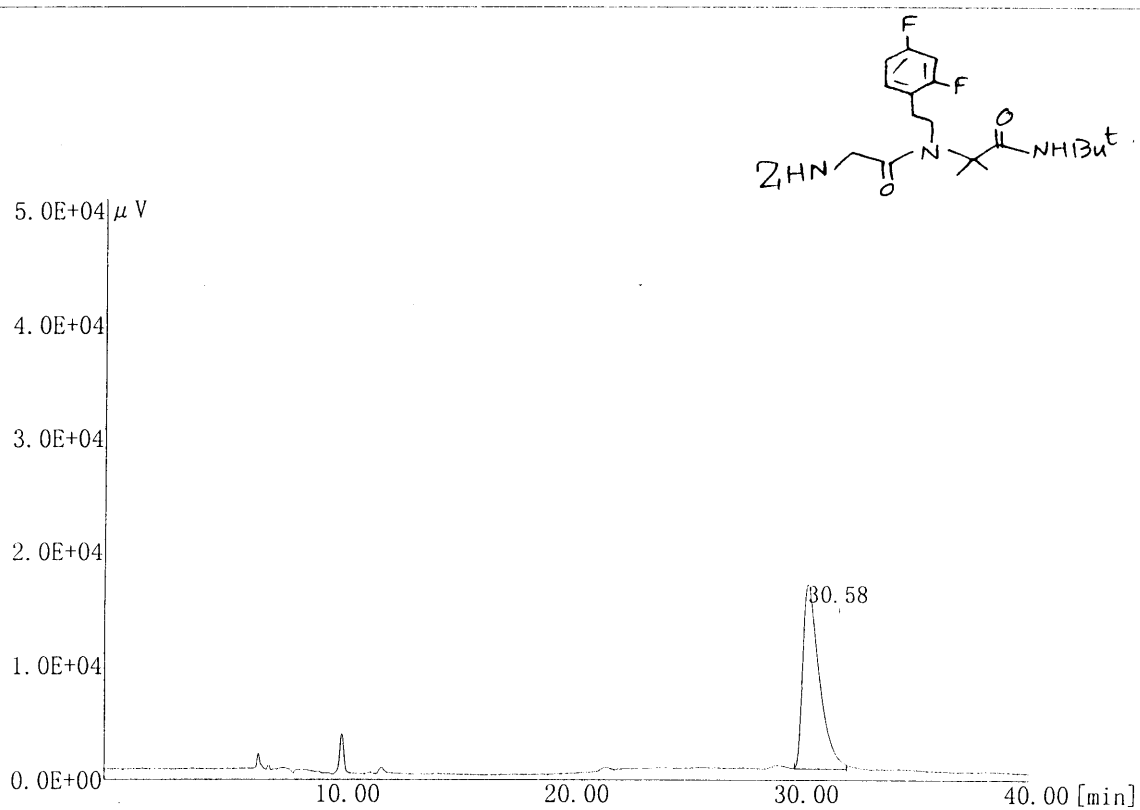

# Compound 2d

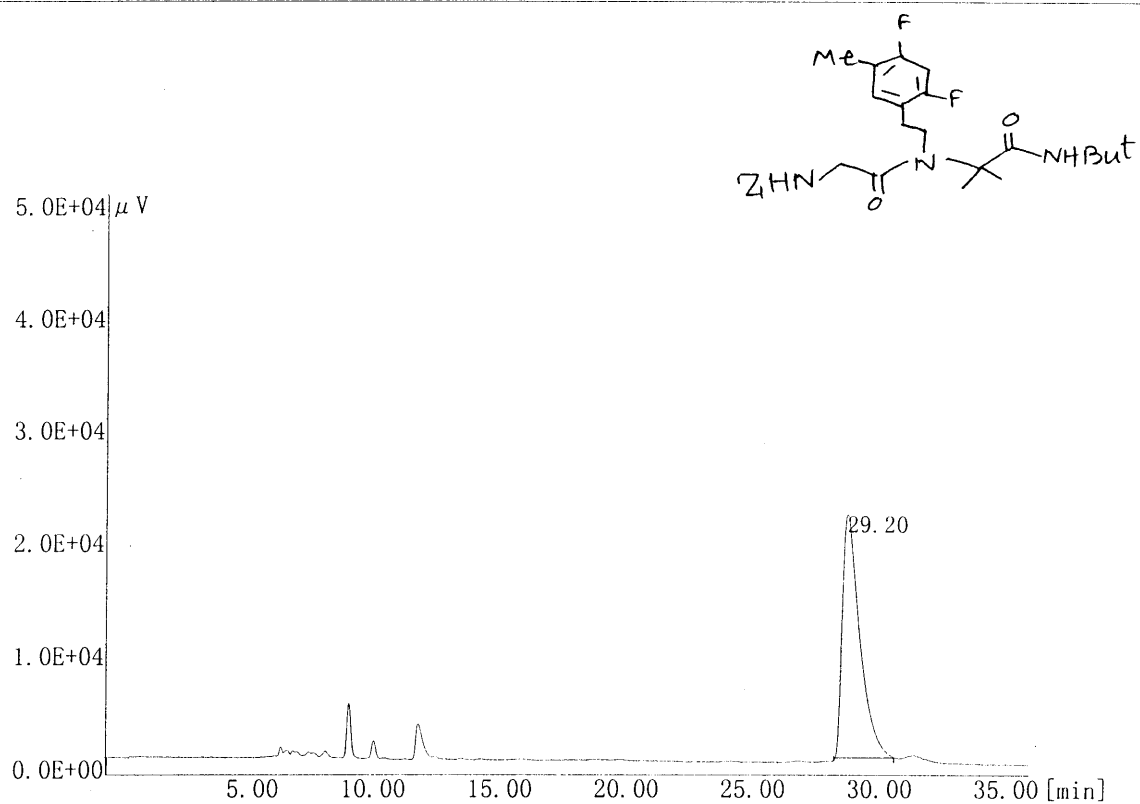

# Compound 2e

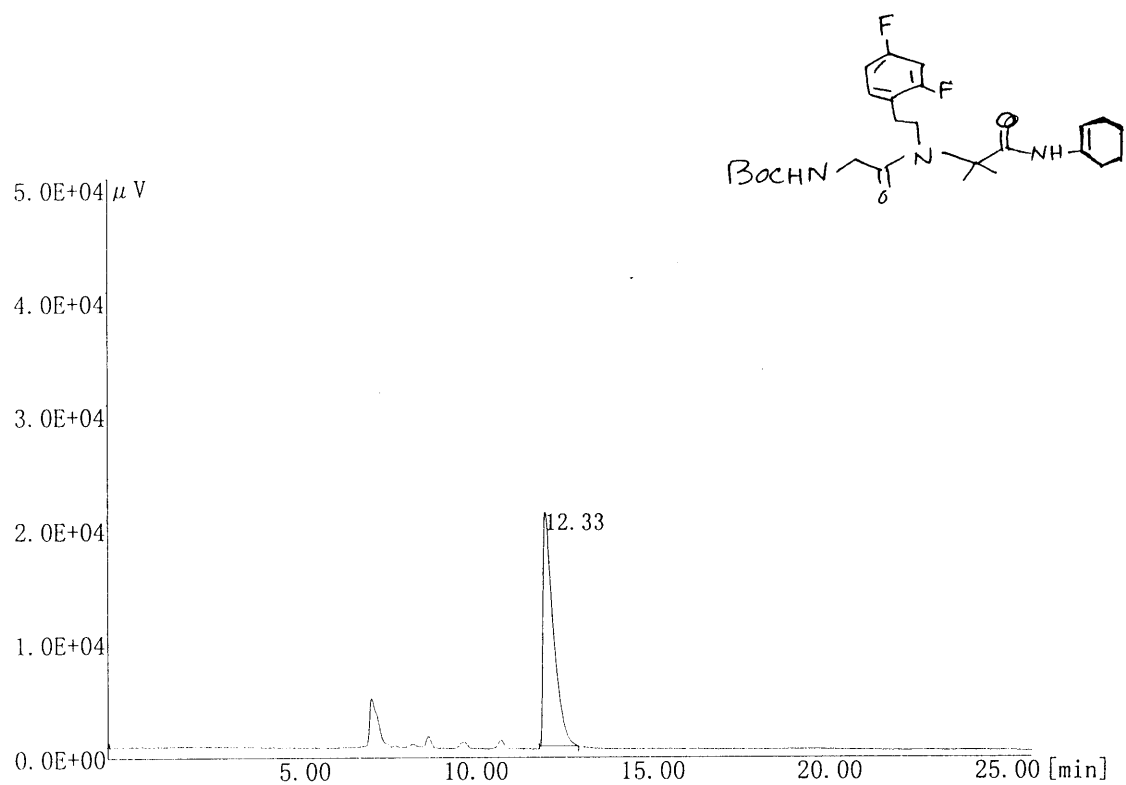

# Compound 8a

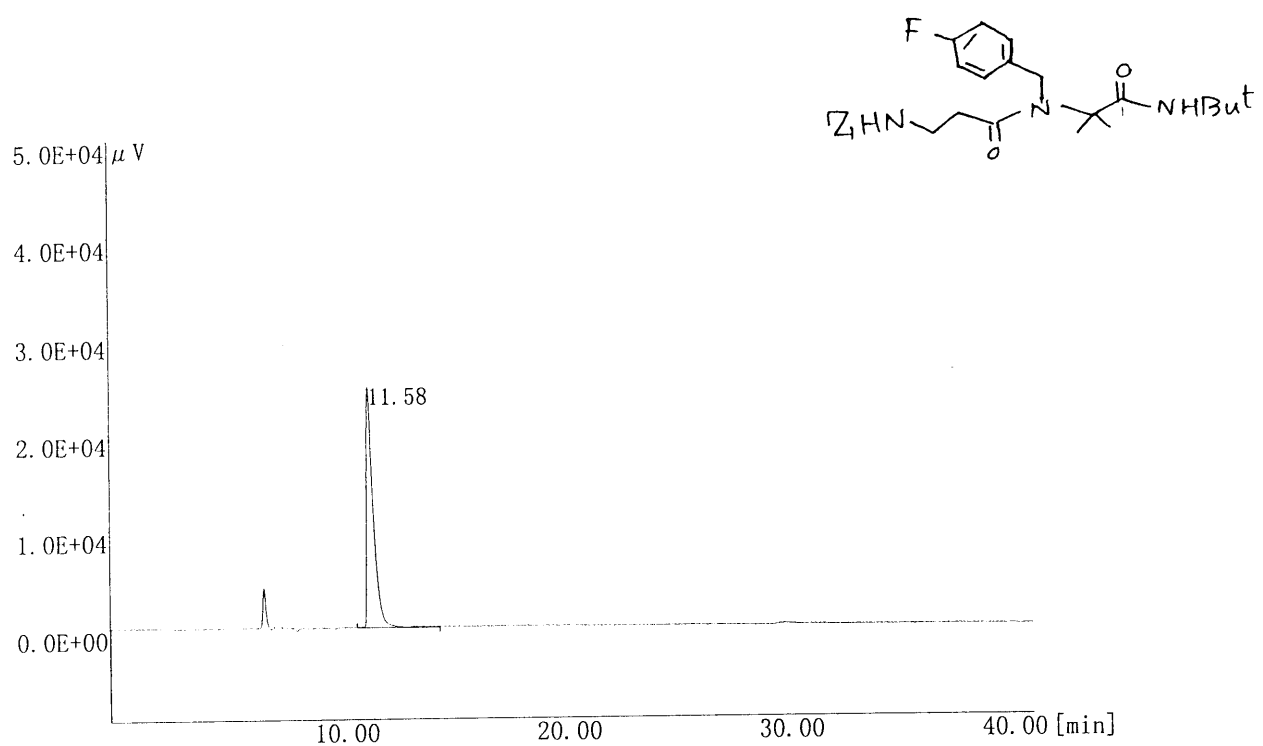

# Compound 8d

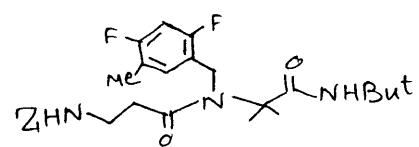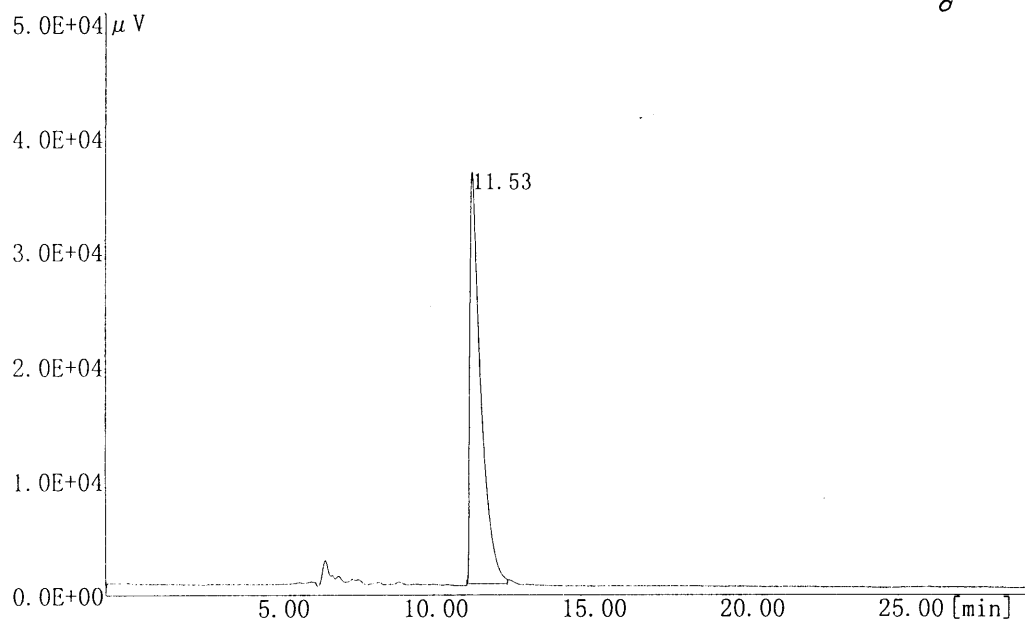

# Compound 8e

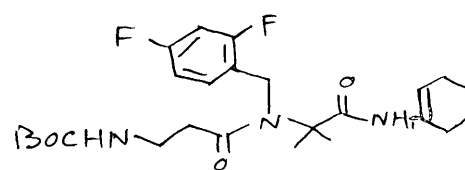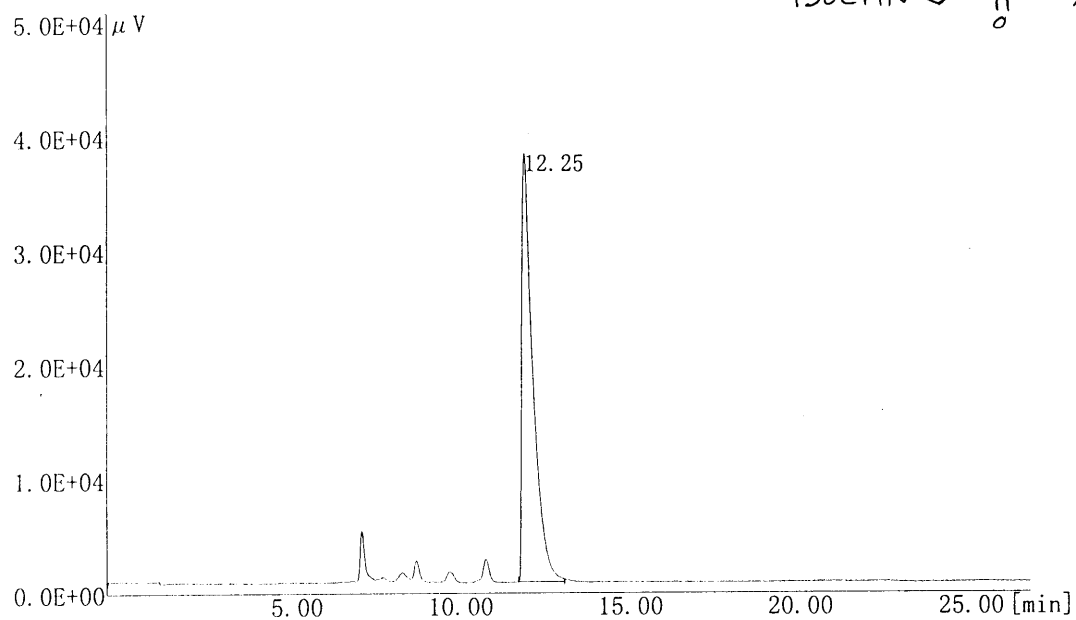

Supplement: b007455lb.pdf [file b007455lb.pdf]
