# Supplementary material for: Application of the Ugi four-component condensation reaction for the synthesis of α,α- and α,β-dipeptides substituted with fluoroarylalkyl pendent groups†
Source: Royal Society of Chemistry journal article supplement (doi:10.1039/b007455l), 2000-01-01
Supplement: b007455la.doc [file b007455la.doc]

# Supplementary data

# Application of the Ugi four-component condensation reaction for the synthesis of ,- and ,-dipeptides substituted with fluoroarylalkyl pendent groups

#### Norio Shibata, Biplab Kumar Das and Yoshio Takeuchi*

*Faculty of Pharmaceutical Sciences, Toyama Medical and Pharmaceutical University, 2630 Sugitani, Toyama 930-0194, Japan. Email:*[*takeuchi@ms.toyama-mpu.ac.jp*](mailto:takeuchi@ms.toyama-mpu.ac.jp)

**General Experimental:** Melting points were determined on a Yanagimoto micro-melting point apparatus and are uncorrected. IR spectra (cm–1) were recorded on a Perkin-Elmer 1600 spectrometer. 1H-NMR spectra were measured as solutions in CDCl3 or D2O and chemical shifts are expressed in ppm relative to internal Me4Si (0.00 ppm) and were recorded on a JEOL GX-270 (270 MHz) or a Varian Gemini 300 (300 MHz) spectrometer. 19F-NMR spectra were measured with CFCl3 as an internal standard and were taken with a JEOL GX-270 (254 MHz) spectrometer. Upfield shifts are quoted as negative values. Electron ionization (EI) mass spectra were taken with a JEOL JMS-D300 spectrometer. Column chromatography and preparative TLC were performed on BW-200 (Fuji Silysia) and Kieselgel 60 (Merck, art. 7748), respectively. All reactions were carried out under a dry N2 atmosphere. Unless otherwise noted, reagents were added by syringe. MeOH was distilled from CaO immediately prior to use.

**Typical experimental procedure:** **Preparation of dipeptide 2a by the Ugi four-component condensation reaction** The amine **3a** (200 mg, 1.52 mmol) and acetone (176 mg, 3.04 mmol) were dissolved in distilled methanol (10 mL) in a flask containing molecular sieves 3 Å. The mixture was allowed to stir for 1 h and then *N*-Z-glycine **4** (635 mg, 3.04 mmol) was added directly into the flask in one portion. A solution of *tert*-butylisonitrile (252 mg, 3.04 mmol) in methanol (1 mL) was added to the flask at –78 oC in one portion. The resulting solution was allowed to stir at room temperature for a week. When the reaction was complete by TLC (5––10% MeOH in CH2Cl2), the reaction mixture was filtered and the solvent was removed *in* *vacuo*. The residue was chromatographed on silica gel BW200, eluting with 0—5% methanol in CH2Cl2 gradient to give **2a** (301 mg, 52%) as a colourless solid. mp 83—84 oC. IR (neat, CHCl3) cm–1: 3410, 3337, 1715, 1663, 1510. 1H-NMR (CDCl3) : 7.29 (m, 5H, ArH), 7.18 (m, 2H, ArH), 6.99 (t, *J* = 8.5 Hz, 2H, ArH), 5.74 (br s, 1H, NH), 5.46 (br s, 1H, NH), 5.11 (s, 2H, CH2Ph), 4.04 (d, *J* = 4.3 Hz, 2H, CH2CON), 3.48 (t, *J* = 8.1 Hz, 2H, CH2CH2N), 2.93 (t, *J* = 8.1 Hz, 2H, CH2CH2N), 1.55 (s, 6H, Me2C<), 1.29 (s, 9H, But). 19F-NMR : –116.2 (m, 1F, ArF). MS *m/z*: 471 (M+). HR-MS Calcd for C26H34FN3O4: 471.2570. Found: 471.2552. *Anal*. Calcd for C26H34FN3O4: C, 66.22; H, 7.27; N, 8.91. Found: C, 65.93; H, 7.20; N, 8.84.

**Preparation of dipeptide (2b)** 　Condensation of **3b** (200 mg, 1.27 mmol), acetone (147.3 mg, 2.53 mmol), **4** (531.8 mg, 2.54 mmol) and *tert*-butylisonitrile (211 mg, 2.54 mmol) gave the compound **2b** (320 mg, 50%) as a white solid. mp 89––90 oC. IR (neat, CHCl3) cm–1:3415, 3322, 1715, 1664, 1507. 1H-NMR (CDCl3) : 7.35 (m, 5H, ArH), 7.18 (m, 1H, ArH), 6.82 (m, 2H, ArH), 5.71 (br s, 1H, NH), 5.45 (br s, 1H, NH), 5.12 (s, 2H, CH2Ph), 4.08 (d, *J* = 4.3 Hz, 2H, CH2CON), 3.48 (t, *J* = 8.2 Hz, 2H, CH2CH2N), 2.96 (t, *J* = 8.2 Hz, 2H, CH2CH2N), 1.54 (s, 6H, Me2C<), 1.32 (s, 9H, But). 19F-NMR : –115.7 (q, *J* = 8.1, 16.6 Hz, 1F), –114.6 (quintet, *J* = 7.5 Hz, 1F). MS *m/z*: 489 (M+). HR-MS Calcd for C26H33F2N3O4: 489.2416. Found: 489.2393.

**Preparation of dipeptide (2c)**　　Condensation of **3c**(200 mg, 0.947 mmol), acetone (109.8 mg, 1.89 mmol), **4** (394 mg, 1.89 mmol) and *tert*-butylisonitrile (157.4 mg, 1.89 mmol) gave the compound **2c** (215 mg, 41%) as a white solid. mp 64––65 oC. IR (neat, CHCl3) cm–1: 3378, 3317, 1735, 1659, 1510. 1H-NMR (CDCl3) : 7.34 (m, 5H, ArH), 5.66 (br s, 1H, NH), 5.46 (br s, 1H, NH), 5.12 (s, 2H, CH2Ph), 4.11 (d, *J* = 7.1 Hz, 2H, CH2CON ), 3.47 (t, *J* = 7.9 Hz, 2H, CH2CH2N), 3.09 ( t, *J* = 7.9 Hz, 2H, CH2CH2N), 1.55 (s, 6H, Me2C<), 1.33 (s, 9H, But). 19F-NMR : –159.9 (td, *J* = 7.5, 7.1 Hz, 2F), –150.8 (t, *J* = 21.0 Hz, 1F), –139.1 (q, *J* = 8.0, 22.0 Hz, 2F). MS *m/z*: 543 (M+). HR-MS Calcd for C26H30F5N3O4: 543.1141. Found: 543.1118. *Anal.*Calcd forC26H30F5N3O4: C, 57.45; H, 5.56; N, 7.73. Found: C, 57.40; H, 5.59; N, 7.54.

**Preparation of dipeptide (2d)** Condensation of **3d** (200 mg, 1.16 mmol), acetone (134.5 mg, 2.32 mmol), **4** (540 mg, 2.58 mmol) and *tert*-butylisonitrile (214.4 mg, 2.58 mmol) gave the compound **2d** (255 mg, 43%) as an oil. IR (neat, CHCl3) cm–1: 3425, 3328, 1746, 1673, 1528, 1452. 1H-NMR (CDCl3) : 7.71 (m, 1H, ArH), 7.34 (m, 5H, ArH), 6.82 (m, 1H, ArH), 5.52 (br s, 1H, NH), 5.44 (br s, 1H, NH), 5.08 (s, 2H, CH2Ph), 4.54 (br s, 2H, CH2CON), 3.47 (t, *J* = 6.5 Hz, 2H, CH2CH2N), 2.48 (t, *J* = 6.5 Hz, 2H, CH2CH2N), 1.62 (s, 3H, ArCH3), 1.34 (s, 6H, Me2C<), 1.27 (s, 9H, But). 19F-NMR –115.1 (q, *J* = 7.8, 15.7 Hz, 1F), –113.7 (q, *J* = 7.5, 14.8 Hz, 1F). MS *m*/*z*: 503 (M+), 506 (M++3). HR-MS Calcd for C27H38O4N3F2: 506.2830 (M++3). Found 506.2835.

**Preparation of dipeptide (2e)** Condensation of **3b** (200 mg, 1.27 mmol), acetone (147.3 mg, 2.54 mmol), *N*-Boc-glycine **14** (444.5 mg, 2.54 mmol) and 1-isocyanocyclohexene **13** (271.7 mg, 2.54 mmol) gave the compound **2e** (275 mg, 45%) as an oil. IR (neat, CHCl3) cm–1: 3423, 3010, 1702, 1505, 1425, 854. 1H -NMR (CDCl3) : 7.19 (m, 2H, ArH), 6.84 (m, 1H, ArH), 6.55 (br s, 1H, NH), 6.05 (m, 1H, CH=C<), 6.47 (br s, 1H, NH), 4.03 (d, *J* = 4.1 Hz, 2H, CH2CON), 3.49 (t, *J* = 8.2 Hz, 2H, CH2CH2N), 2.97 (t, *J* = 8.2 Hz, 2H, CH2CH2N), 2.13—1.59 (m, 8H, CH2 x 4), 1.59 (s, 6H, Me2C<) 1.43 (s, 9H, But). MS *m/z*: 479 (M+). HR-MS Calcd for C25H35N3F2O4: 479.1526. Found: 479.1515.

**Preparation of free dipeptide (2f)** To a solution of compound **2e** (30 mg, 0.062 mmol) in THF (3 mL) was added 3N HCl (2 mL) and allowed to stir overnight at room temperature. The reaction mixture was evaporated *in* *vacuo* and dissolved in H2O (10 mL). Then it was extracted with ether (50　mL). The aqueous portion was taken and evaporated with subsequent freeze drying to give **2f** (19 mg, 100%) as sticky solid. 1H-NMR (D2O) : 7.21 (m, 1H, ArH), 6.78 (m, 2H, ArH), 3.86 (s, 2H, CH2CON), 3.44 (t, *J* = 8.0 Hz, 2H, CH2CH2N), 2.86 (t, *J* = 8.0 Hz, 2H, CH2CH2N), 1.42 (s, 6H, Me2C<). MS *m/z*: 300.13 (M+).

**Preparation of dipeptide (8a)** Condensation of **11a** (200 mg, 1.65 mmol), acetone (191.4 mg, 3.3 mmol), **10** (736 mg, 3.3 mmol) and *tert*-butylisonitrile (274.3 mg, 3.3 mmol) gave thecompound **8a** (460 mg, 59%) as a white solid. mp 74––75 oC. IR (neat, CHCl3) cm–1: 3433, 3341, 1712, 1664, 1511. 1H-NMR (CDCl3) 7.34 (m, 7H, ArH), 7.03 (t, *J* = 8.5 Hz, 2H, ArH), 5.58 (br s, 1H, NH), 5.44 (br s, 1H, NH), 5.08 (s, 2H, CH2Ph), 4.53 (s, 2H, ArCH2N), 3.47 (q, *J* = 5.7, 11.5 Hz, 2H, CH2CH2N), 2.51 (t, *J* = 5.4 Hz, 2H, CH2CH2N), 1.37 (s, 6H, Me2C<), 1.32 (s, 9H, But). 19F-NMR : –115.5 (m, ArF). MS *m/z*: 471(M+). HR-MS Calcd for C26H34FN3O4: 471.2533. Found: 471.2543.*Anal.* Calcd for C26H34FN3O4: C, 66.22; H, 7.27; N, 8.91. Found: C, 65.74; H, 7.31; N, 8.64.

**Preparation of dipeptide (8b)** Condensation of **11b** (200 mg, 1.39 mmol), acetone (161.2 mg, 2.78 mmol), **10** (620 mg, 2.78 mmol) and *tert*-butylisonitrile (231 mg, 2.78 mmol) gave the compound **8b** (450 mg, 66%) as a white solid. mp 73––74 oC. IR (neat, CHCl3) cm –1: 3435, 3339, 1714, 1659, 1509. 1H-NMR (CDCl3) 7.71 (m, 1H, ArH), 7.34 (m, 5H, ArH), 6.83 (m, 2H, ArH), 5.53 (br s, 1H, NH), 5.44 (br s, 1H, NH), 5.08 (s, 2H, CH2Ph), 4.54 (br s, 2H, ArCH2N), 3.47 (q, *J* = 5.6, 11.2 Hz, 2H, CH2CH2N), 2.48 (t, *J* = 5.4 Hz, 2H, CH2CH2N), 1.37 (s, 6H, Me2C<), 1.34 (s, 9H, But). 19F-NMR : –115.2 (q, *J* = 8.7, 17.5 Hz, 1F), –111.7 (quintet, *J* = 7.6 Hz, 1F). MS *m/z*: 489 (M+). HR-MS Calcd for C26H33F2N3O4: 489.2475. Found: 489.2457. *Anal.* Calcd for C26H33F2N3O4: C, 63.29; H, 6.79; N, 8.58. Found: C, 63.58; H, 6.88; N, 8.56.

**Preparation of dipeptide (8c)** Condensation of **11c** (200 mg, 1.01 mmol), acetone (117 mg, 2.02 mmol), **10** (451 mg, 2.02 mmol) and *tert*-butylisonitrile (168 mg, 2.02 mmol) gave the compound **8c** (240 mg, 43%) as a white solid. mp 86––87 oC. IR (neat, CHCl3) cm –1: 3437, 3346, 1714, 1660, 1508. 1H-NMR (CDCl3) 7.33 (m, 5H, ArH), 5.55 (br s, 1H, NH), 5.47 (br s, 1H, NH), 5.09 (s, 2H, CH2Ph), 4.73 (br s, 2H, ArCH2N), 3.52 (q, *J* = 6.1, 11.5 Hz, 2H, CH2CH2N), 2.68 (t, *J* = 5.4 Hz, 2H, CH2CH2N), 1.36 (s, 6H, Me2C<), 1.27 (s, 9H, But). 19F-NMR : –156.7 (td, *J* = 7.1. 7.0 Hz, 2F), –149.5 (t, *J* = 19.0 Hz, 1F), –137.5 (q, *J* = 7.0, 20.0 Hz, 2F). MS *m/z*: 543 (M+), 542 (M+–1). HR-MS Calcd for C24H30F5N3O4: 543.2156. Found: 543.2145. *Anal.* Calcd for C24H30F5N3O4: C, 57.45; H, 5.56; N, 7.73. Found: C, 57.24; H, 5.56, N, 7.59.

**Preparation of dipeptide (8d)** Condensation of **11d** (200 mg, 1.27 mmol), acetone (147.3 mg, 2.54 mmol), **10** (567 mg, 2.54 mmol) and *tert*-butylisonitrile (211 mg, 2.54 mmol) gave the compound **8d** (265 mg, 43%) as a white solid. mp 120––121 oC. IR (neat, CHCl3) cm–1: 3433, 3327, 1713, 1663, 1510. 1H-NMR (CDCl3) : 7.29 (m, 5H, ArH), 7.19 (m, 1H, ArH), 6.76 (t, *J* = 9.8 Hz, 1H, ArH), 5.57 (br s, 1H, NH), 5.43 (s, 1H, NH), 5.08 (s, 2H, CH2Ph), 4.53 (br s, 2H, ArCH2N ), 3.48 (q, *J* = 6.0, 11.2 Hz, 2H, CH2CH2N), 2.56 (t, *J* = 5.4 Hz, 2H, CH2CH2N), 2.22 (s, 3H, ArCH3), 1.37 (s, 6H, Me2C<), 1.32 (s, 9H, But). MS *m/z*: 503 (M+). HR-MS Calcd for C26H35F2N3O4: 503.2596. Found: 503.2596.

**Preparation of dipeptide (8e)** Condensation of **11b** (200 mg, 1.39 mmol), acetone (162 mg, 2.79 mmol), *N*-Boc--homoalanine **15** (623.7 mg, 2.79 mmol) and 1-isocyanocyclohexene **13** (299 mg, 2.79 mmol) gave the compound **8e** (290 mg, 45%) as an oil. IR (neat, CHCl3) cm–1: 3448, 3187, 1692, 1656, 1504, 853. 1H-NMR (CDCl3) 7.81 (m, 1H, ArH), 6.84 (m, 2H, ArH), 6.54 (br s, 1H, NH), 6.05 (m, 1H, CH=C<), 5.22 (br s, 1H, NH), 4.57 (s, 2H, ArCH2N), 3.38 (q, *J* = 5.6, 11.3 Hz, 2H, CH2CH2N), 2.47 (t, *J* = 5.4 Hz, 2H, CH2CH2N), 2.13––1.58 (m, 8H, CH2 x 4), 1.44 (s, 6H, Me2C<), 1.42 (s, 9H, But). MS *m/z*: 479 (M+), 422 (M+–tBu). HR-MS Calcd for C25H35N3F2O4: 479.2563. Found: 479.2539.

**Preparation of free dipeptide (8f)** The compound **8f** (12 mg, 98%) was prepared from **4e** (20 mg, 0.041 mmol), THF (2 mL) and 3M HCl (1 mL) as sticky solid. 1H- NMR (D2O) : 7.47 (m, 1H, ArH), 6.93 (m, 2H, ArH), 3.97 (s, 2H, ArCH2N), 3.12 (t, *J* = 7.8 Hz, 2H, CH2CH2N), 2.73 (t, *J* = 7.9 Hz, 2H, CH2CH2N), 1.29 (s, 6H, Me2C<). MS *m/z*: 300.13 (M+).

Note: 1H-NMR and HPLC spectra of compounds **2** and **8** are given as Supplementary information.
